1 **Distinct temporal difference error signals in dopamine axons in three regions**  
2 **of the striatum in a decision-making task**

3

4 Iku Tsutsui-Kimura<sup>1</sup>, Hideyuki Matsumoto<sup>1,2</sup>, Naoshige Uchida<sup>1</sup> and Mitsuko Watabe-Uchida<sup>1,3,\*</sup>

5

6

7

8

9 **Affiliations:**

10 <sup>1</sup>Department of Molecular and Cellular Biology, Center for Brain Science, Harvard University,

11 Cambridge, MA 02138, USA

12 <sup>2</sup>Department of Physiology, Osaka City University Graduate School of Medicine, Osaka, 545-8585, Japan

13 <sup>3</sup>Lead Contact

14

15 \*Correspondence: [mitsuko@mcb.harvard.edu](mailto:mitsuko@mcb.harvard.edu) (M.W.-U.)

16

17

18

19 **SUMMARY**

20

21 Different regions of the striatum regulate different types of behavior. However, how dopamine  
22 signals differ across striatal regions and how dopamine regulates different behaviors remain  
23 unclear. Here, we compared dopamine axon activity in the ventral, dorsomedial, and dorsolateral  
24 striatum, while mice performed in a perceptual and value-based decision task. Surprisingly,  
25 dopamine axon activity was similar across all three areas. At a glance, the activity multiplexed  
26 different variables such as stimulus-associated values, confidence and reward feedback at  
27 different phases of the task. Our modeling demonstrates, however, that these modulations can be  
28 inclusively explained by moment-by-moment *changes* in the expected reward, i.e. the temporal  
29 difference error. A major difference between these areas was the overall activity level of reward  
30 responses: reward responses in dorsolateral striatum (DLS) were positively shifted, lacking  
31 inhibitory responses to negative prediction error. Tenets of habit and skill can be explained by  
32 this positively biased dopamine signal in DLS.

33

34

35 **Keywords**

36

37 dopamine, TD error, confidence, value, striatum, choice, feedback

38

39

40

41

42

43

44

45

## 46 INTRODUCTION

47

48 Flexibility in behavior relies critically on an animal's ability to alter behavior based on past  
49 experiences. In particular, the behavior of the animal is greatly shaped by the consequences of  
50 specific actions – whether a previous action led to positive or negative experiences. One of the  
51 fundamental questions in neuroscience is how animals learn from rewards and punishments.

52

53 A neurotransmitter, dopamine, is thought to be a key regulator of learning from rewards and  
54 punishments (Hart et al., 2014; Montague et al., 1996; Schultz et al., 1997). Neurons that release  
55 dopamine (hereafter, dopamine neurons) are located mainly in the ventral tegmental area (VTA)  
56 and substantia nigra pars compacta (SNc). These neurons send their axons to various regions  
57 including the striatum, neocortex, and amygdala (Menegas et al., 2015; Yetnikoff et al., 2014).  
58 The striatum, which receives the densest projection from VTA and SNc dopamine neurons, is  
59 thought to play particularly important roles in learning from rewards and punishments (Lloyd  
60 and Dayan, 2016; O'Doherty et al., 2004). However, what information dopamine neurons  
61 convey to the striatum, and how dopamine regulates behavior through its projections to the  
62 striatum remain elusive.

63

64 A large body of experimental and theoretical studies have suggested that dopamine neurons  
65 signal reward prediction errors (RPEs) – the discrepancy between actual and predicted rewards  
66 (Bayer and Glimcher, 2005; Cohen et al., 2012; Hart et al., 2014; Schultz et al., 1997). In  
67 particular, the activity of dopamine neurons resembles a specific type of prediction error, called  
68 temporal difference RPE (TD error) (Montague et al., 1996; Schultz et al., 1997; Sutton, 1988;  
69 Sutton and Barto, 1987). Although it was widely assumed that dopamine neurons broadcast  
70 homogeneous RPEs to a swath of dopamine-recipient areas, recent findings indicated that  
71 dopamine signals are more diverse than previously thought (Brown et al., 2011; Kim et al., 2015;  
72 Matsumoto and Hikosaka, 2009; Menegas et al., 2017, 2018; Parker et al., 2016). For one, recent  
73 studies have demonstrated that a transient (“phasic”) activation of dopamine neurons occurs near  
74 the onset of a large movement (e.g. locomotion), regardless of whether these movements are  
75 immediately followed by a reward (Howe and Dombek, 2016; da Silva et al., 2018). These  
76 phasic activations at movement onsets have been observed in the somatic spiking activity in the

77 SNc (da Silva et al., 2018) as well as the axonal activity in the dorsal striatum (Howe and  
78 Dombeck, 2016). Another study showed that dopamine axons in the dorsomedial striatum  
79 (DMS) are activated when the animal makes a contralateral orienting movement in a decision-  
80 making task (Parker et al., 2016). Other studies have also found that dopamine axons in the  
81 posterior or ventromedial parts of the striatum are activated by aversive or threat-related stimuli  
82 (de Jong et al., 2019; Menegas et al., 2017). An emerging view is that dopamine neurons  
83 projecting to different parts of the striatum convey distinct signals and support different  
84 functions (Cox and Witten, 2019).

85  
86 Previous studies have shown that different parts of the striatum control distinct types of reward-  
87 oriented behaviors (Dayan and Berridge, 2014; Graybiel, 2008; Malvaez and Wassum, 2018;  
88 Rangel et al., 2008). First, the ventral striatum (VS) has often been associated with Pavlovian  
89 behaviors, where the expectation of reward triggers relatively pre-programmed behaviors  
90 (approaching, consummatory behaviors etc.) (Dayan and Berridge, 2014). Psychological studies  
91 suggest that these behaviors are driven by stimulus-outcome associations (Kamin, 1969; Pearce  
92 and Hall, 1980; Rescorla and Wagner, 1972). Consistent with this idea, previous experiments  
93 have shown that dopamine in VS conveys canonical RPE signals (Menegas et al., 2017; Parker et  
94 al., 2016), and support learning of values associated with specific stimuli (Clark et al., 2012). In  
95 contrast, the dorsal part of the striatum has been linked to instrumental behaviors, where animals  
96 acquire an arbitrary action that leads to a reward (Montague et al., 1996; Suri and Schultz, 1999).  
97 Instrumental behaviors are further divided into two distinct types: goal-directed and habit  
98 (Dickinson and Weiskrantz, 1985). Goal-directed behaviors are “flexible” reward-oriented  
99 behaviors that are sensitive to a causal relationship (“contingency”) between action and outcome,  
100 and can quickly adapt to changes in the value of the outcome (Balleine and Dickinson, 1998).  
101 After repetition of a goal-directed behavior, the behavior can become a habit which is  
102 characterized by insensitivity to changes in the outcome value (e.g. devaluation) (Balleine and  
103 O’Doherty, 2010). According to psychological theories, goal-directed and habitual behaviors are  
104 supported by distinct internal representations: action-outcome and stimulus-response  
105 associations, respectively (Balleine and O’Doherty, 2010). Lesion studies have indicated that  
106 goal-directed behaviors and habit are controlled by DMS and the dorsolateral striatum (DLS),  
107 respectively (Yin et al., 2004, 2005).



108

109 Instrumental behaviors are shaped by reward, and it is generally thought that dopamine is  
110 involved in their acquisition (Gerfen and Surmeier, 2011; Montague et al., 1996; Schultz et al.,  
111 1997). However, how dopamine is involved in distinct types of instrumental behaviors remain  
112 unknown. A prevailing view in the field is that habit is controlled by “model-free” reinforcement  
113 learning, while goal-directed behaviors are controlled by “model-based” mechanisms (Daw et  
114 al., 2005; Dolan and Dayan, 2013; Rangel et al., 2008). In this framework, habitual behaviors are  
115 driven by “cached” values associated with specific actions (action values) which animals learn  
116 through direct experiences via dopamine RPEs. In contrast, goal-directed behaviors are  
117 controlled by a “model-based” mechanism whereby action values are computed by mentally  
118 simulating which sequence of actions lead to which outcome using a relatively abstract  
119 representation (model) of the world. Model-based behaviors are more flexible compared to  
120 model-free behaviors because a model-based mental simulation may allow the animal to  
121 compute values in novel or changing circumstances. Although these ideas account for the  
122 relative inflexibility of habit over model-based, goal-directed behaviors, they do not necessarily  
123 explain the most fundamental property of habit, that is, its insensitivity to changes in outcome, as  
124 cached values can still be sensitive to RPEs when the actual outcome violates expectation,  
125 posing a fundamental limit in this framework (Dezfouli and Balleine, 2012; Miller et al., 2019).  
126 Furthermore, the idea that habits are supported by action value representations does not  
127 necessarily match with the long-held view of habit based on stimulus-response associations.

128

129 Until recently an implicit assumption across many studies was that dopamine neurons broadcast  
130 the same teaching signals throughout the striatum to support different kinds of learning (Rangel  
131 et al., 2008; Samejima and Doya, 2007). However, as mentioned before, more recent studies  
132 revealed different dopamine signals across striatal regions, raising the possibility that different  
133 striatal regions receive distinct teaching signals. In any case, few studies have directly examined  
134 the nature of RPE signals across striatal regions in instrumental behaviors, in particular, between  
135 DLS and other regions. As a result, it remains unclear whether different striatal regions receive  
136 distinct dopamine signals during instrumental behaviors. Are dopamine signals in particular  
137 areas dominated by movement-related signals? Are dopamine signals in these areas still  
138 consistent with RPEs or are they fundamentally distinct? How are they different? Characterizing

139 dopamine signals in different regions is a critical step toward understanding how dopamine may  
140 regulate distinct types of behavior.

141

142 In the present study, we sought to characterize dopamine signals in different striatal regions (VS,  
143 DMS and DLS) during instrumental behaviors. We used a task involving both perceptual and  
144 value-based decisions in freely-moving mice – a task that is similar to those previously used to  
145 probe various important variables in the brain such as values, biases (Rorie et al., 2010; Wang et  
146 al., 2013), confidence (Hirokawa et al., 2019; Kepecs et al., 2008), belief states (Lak et al.,  
147 2017), and response vigor (Wang et al., 2013). In this task, the animal goes through various  
148 movements and mental processes – self-initiating a trial, collecting sensory evidence, integrating  
149 the sensory evidence with reward information, making a decision, initiating a choice movement,  
150 committing to an option and waiting for reward, receiving an outcome of reward or no reward,  
151 and adjusting internal representations for future performance using RPEs and confidence.

152 Compared to Pavlovian tasks, which have been more commonly used to examine dopamine  
153 RPEs, the present task has various factors with which to contrast dopamine signals between  
154 different areas.

155

156 Contrary to our initial hypothesis, dopamine signals in all three areas showed similar dynamics,  
157 going up and down in a manner consistent with TD errors, reflecting moment-by-moment  
158 *changes* in the expected future reward (i.e. state values). Notably, although we observed  
159 correlates of accuracy and confidence in dopamine signals, consistent with previous studies  
160 (Engelhard et al., 2019; Lak et al., 2017), the appearance of these variables was timing- and trial  
161 type-specific. In stark contrast, our modeling demonstrate that these apparently diverse dopamine  
162 signals can be inclusively explained by a single variable – TD error, that is moment-by-moment  
163 changes in the expected reward in each trial. In addition, we found consistent differences  
164 between these areas. For instance, DMS dopamine signals were modulated by contralateral  
165 orienting movements, as reported previously (Parker et al., 2016). Furthermore, DLS dopamine  
166 signals, while following TD error dynamics, were overall more positive, compared to other  
167 regions. Based on these findings, we present novel models of how these distinct dopamine  
168 signals may give rise to distinct types of behavior such as flexible versus habitual behaviors.

169

170

## 171 **RESULTS**

172

### 173 **A perceptual decision-making task with reward amount manipulations**

174

175 Mice were first trained in a perceptual decision-making task using olfactory stimuli (Figure 1)  
176 (Uchida and Mainen, 2003). To vary the difficulty of discrimination, we used two odorants  
177 mixed with different ratios (Figure 1A). Mice were required to initiate a trial by poking their  
178 nose into the central odor port, which triggered a delivery of an odor mixture. Mice were then  
179 required to move to the left or right water port depending on which odor was dominant in the  
180 presented mixture. Odor-water side (left or right) rule was held constant throughout training and  
181 recording in each animal. In order to minimize temporal overlaps between different trial events  
182 and underlying brain processes, we introduced a minimum time required to stay in the odor port  
183 (for 1 s before exiting the odor port) and in the water port (for 1 s) to receive a water reward.

184

185 After mice learned the task, the water amounts at the left and right water ports were manipulated  
186 (Lak et al., 2017; Rorie et al., 2010; Wang et al., 2013) in a probabilistic manner. In our task, one  
187 of the reward ports was associated with a big or medium size of water (BIG side) while another  
188 side was associated with a small or medium size of water (SMALL side) (Figure 1A). In a daily  
189 session, there were two blocks of trials, the first with equal-sized water and the second with  
190 different distributions of water sizes on the two sides (BIG versus SMALL side). The reward  
191 ports for BIG or SMALL conditions stayed unchanged within a session, and were randomly  
192 chosen for each session. In each reward port (BIG or SMALL side), which of the two reward  
193 sizes was delivered was randomly assigned in each trial. Note that the medium-sized reward is  
194 delivered with the probability of 0.5 for every correct choice at either side. This design was used  
195 to facilitate our ability to characterize RPE-related responses even after mice were well trained  
196 (Tian et al., 2016). First, the responses to the medium sized-reward allowed us to characterize  
197 how “reward expectation” affects dopamine reward responses because we can examine how  
198 different levels of expectation, associated with the BIG and SMALL side, affect dopamine  
199 responses to reward of the same (medium) amount. Conversely, for a given reward port, two

200 sizes of reward allow us to characterize the effect of “actual reward” on dopamine responses, by  
201 comparing the responses when the actual reward was smaller versus larger than expected.

202

203 We first characterized the choice behavior by fitting a psychometric function (a logistic  
204 function). Compared to the block with equal-sized water, the psychometric curve was shifted  
205 laterally to the BIG side (Figure 1B, Figure S1). The fitted psychometric curves were laterally  
206 shifted whereas the slopes were not significantly different across blocks ( $p=0.45$ ) (Figure 1B).  
207 We, therefore, quantified a choice bias as a lateral shift of the psychometric curve with a fixed  
208 slope in terms of the % mixture of odors for each mouse (Figure 1C) (Wang et al., 2013). All the  
209 mice exhibited a choice bias toward the BIG side (22/22 animals). Because a “correct” choice  
210 (i.e. whether a reward is delivered or not) was determined solely by the stimulus in this task,  
211 biasing their choices away from the 50/50 boundary inevitably lowers the choice accuracy (or  
212 equivalently, the probability of reward). For ambiguous stimuli, however, mice could go for a  
213 big reward, even sacrificing accuracy, in order to increase the long-term gain. Indeed, the  
214 observed biases approximated the optimal bias that maximizes total reward ( $1.016 \pm 0.001$  times  
215 reward compared to no bias, mean  $\pm$  s.e.m, slightly less than the optimal bias that yields 1.022  
216 times reward compared to no bias), rather than maximizing the accuracy (= reward probability,  
217 i.e. no bias) or solely minimizing the risk (the variance of reward amounts) (Figures 1D and 1E).

218

219 Previous studies have shown that animals shift their decision boundary even without reward  
220 amount manipulations in perceptual decision tasks (Lak et al., 2020a). These shifts occur on a  
221 trial-by-trial basis, following a win-stay strategy, choosing the same side when that side was  
222 associated with reward in the previous trial, particularly when the stimulus was more ambiguous  
223 (Lak et al., 2020a). In the current task design, however, the optimal bias is primarily determined  
224 by the sizes of reward (more specifically, which side delivered a big or small reward) which  
225 stays constant across trials within a session. To determine whether the animal adopted a short-  
226 time scale updating or a more stable bias, we next examined how receipt of reward affected the  
227 choice in the subsequent trials. To extract trial-by-trial updating, we compared the psychometric  
228 curves 1 trial before ( $n-1$ ) and after ( $n+1$ ) the current trials ( $n$ ). This analysis was performed  
229 separately for the rewarded side in the current ( $n$ ) trials. We found that choice biases before and  
230 after a specific reward location were not significantly different in any trial types (Figure 1F),

231 suggesting that trial-by-trial updating was minimum, contrary to a previous study (Lak et al.,  
232 2020b). Instead, these results indicate that the mice adopted a relatively stable bias that lasts  
233 longer than one trial.

234  
235 Although we imposed a minimum time required to stay in the odor port, the mice showed  
236 different reaction times (the duration between odor onset and odor port exit) across different trial  
237 types (Figure 1G). First, reaction times were shorter when animals chose the BIG side compared  
238 to the SMALL side in easy, but not difficult, trials. Second, reaction times were positively  
239 correlated with the level of sensory evidence for choice (as determined by odor % for the choice)  
240 when mice chose the BIG side. However, this modulation was not evident when mice chose the  
241 SMALL side.

242

### 243 **Overall activity pattern of dopamine axons in the striatum**

244

245 To monitor the activity of dopamine neurons in a projection specific manner, we recorded the  
246 dopamine axon activity in the striatum using a calcium indicator, GCaMP7f (Dana et al., 2019)  
247 with fiber fluorometry (Kudo et al., 1992) (fiber photometry) (Figure 2). We targeted a wide  
248 range of the striatum including the relatively dorsal part of VS, DMS and DLS (Figure 2B).  
249 Calcium signals were monitored from mice both before and after introducing water amount  
250 manipulations ( $n = 9, 7, 6$  mice, for VS, DMS, DLS).

251

252 The main analysis was performed using the calcium signals obtained in the presence of water  
253 amount manipulations. To isolate responses that are time-locked to specific task events but with  
254 potentially overlapping temporal dynamics, we first fitted dopamine axon activity in each animal  
255 with a linear regression model using multiple temporal kernels (Park et al., 2014) with Lasso  
256 regularization with 10-fold cross validation (Figure 2). We used kernels that extract stereotypical  
257 time courses of activity locked to four different events: odor onset (odor), odor port exit  
258 (movement), water port entry (choice commitment or “choice” for short), and reward delivery  
259 (water) (Figures 2C-2F).

260

261 The constructed model captured modulations of dopamine axon activity time-locked to different  
262 events (Figure 2C). On average, the magnitude of the extracted odor-locked activity was  
263 modulated by odor cues. Dopamine axons were more excited by a pure odor associated with the  
264 BIG side than a pure odor associated with the SMALL side (Figures 2C and 2F). The movement-  
265 locked activity was stronger for a movement toward the contra-lateral, compared to the ipsi-  
266 lateral side, which was most evident in DMS (Parker et al., 2016) but much smaller in VS or  
267 DLS (Figure 2E, %Explained by movement). The choice-locked activity showed two types of  
268 modulations (Figure 2C). First, it exhibited an inhibition in error trials at the time of reward (i.e.  
269 when it has become clear that reward is not going to come). Second, dopamine activity showed a  
270 modulation around the time of water port entry, an excitation when the choice was correct, and  
271 an inhibition when the choice was incorrect, even before the mice received a feedback. These  
272 “choice commitment”-related signals will be further analyzed below. Finally, delivery of water  
273 caused a strong excitation which was modulated by the reward size (Figures 2C and 2F).  
274 Furthermore, the responses to medium-sized water was slightly but significantly smaller on the  
275 BIG side compared to the SMALL side (Figures 2C and 2F). The contribution of water-locked  
276 kernels was larger than other kernels except in DMS, where odor, movement and water kernels  
277 contributed similarly (Figures 2D and 2E).

278  
279 In previous studies, RPE-related signals have typically been characterized by phasic responses to  
280 reward-predictive cues and a delivery or omission of reward. Overall, the above results  
281 demonstrate that observed populations contain the basic response characteristics of RPEs. First,  
282 dopamine axons were excited by reward-predicting odor cues, and the magnitude of the response  
283 was stronger for odors that instructed the animal to go to the side which is associated with a  
284 higher value (i.e. BIG side). Responses to water were modulated by reward amounts, and the  
285 water responses were suppressed by higher reward expectation. These characteristics were also  
286 confirmed by using the actual responses, instead of obtained kernel models (Figures 2F and 2G).  
287 Finally, in error trials, dopamine axons were inhibited when the time passed beyond the expected  
288 time of reward, as the negative outcome becomes certain (Figure 2C). Next, we will investigate  
289 each striatal area in more detail.

290

291 **Shifted representation of TD error in dopamine axon activity across the striatum**

292

293 Although excitation to unpredicted reward is one of the signatures of dopamine RPE, recent  
294 studies found that the dopamine axon response to water is small or undetectable in some part of  
295 the dorsal striatum (Howe and Dombeck, 2016; Parker et al., 2016; da Silva et al., 2018).

296 Therefore, the above observation that all three areas (VS, DMS, and DLS) exhibited modulation  
297 by reward may appear at odds with previous studies.

298

299 We noticed greatly diminished water responses when the reward amount was not manipulated,  
300 that is, when dopamine axon signals were monitored during training sessions before introducing  
301 the reward amount manipulations (Figure 3). In these sessions, dopamine axons in some animals  
302 did not show significant excitation to water rewards (Figures 3A and 3D). This “lack” of reward  
303 response was found in DMS, consistent with previous studies (Parker et al., 2016), but not in VS  
304 or DLS (Figure 3G). Surprisingly, however, DMS dopamine axons in the same animals showed  
305 clear excitation when reward amount manipulations were introduced, particularly strongly  
306 responding to a big reward (Figures 3B and 3E). Indeed, the response patterns were qualitatively  
307 similar across different striatal areas (Figure 4); the reward responses in all the areas were  
308 modulated by reward size and expectation, although the whole responses seem to be shifted  
309 higher in DLS, and lower in DMS (Figures 4A and 4B). These results indicate that a stochastic  
310 nature of reward delivery in our task enhanced or “rescued” reward responses in dopamine axons  
311 in DMS.

312

313 The above results emphasized the overall similarity of reward responses across areas, but some  
314 important differences were also observed. Most notably, although a delivery of a small reward  
315 caused an inhibition of dopamine axons below baseline in VS and DMS, the activity remained  
316 non-negative in DLS. The overall responses tended to be higher in DLS.

317

318 In order to understand the diversity of dopamine responses to reward, we examined modulation  
319 of dopamine activity by different parameters (Figure 4D). First, the effect of the amount of  
320 “actual” reward was quantified by comparing responses to different amounts of water for a given  
321 cue (i.e. the same expectation). The reward responses in all areas were modulated by reward  
322 amounts, with a slightly higher modulation by water amounts in VS (Figure 4D Water big-



323 medium, Water medium-small). Next, the effect of expectation was quantified by comparing the  
324 responses to the same amounts of water with prediction of different amounts. Effects of reward  
325 size prediction were not significantly different across areas, although VS showed slightly less  
326 modulation with more variability (Figure 4D, prediction SMALL-BIG).

327  
328 Next, we sought to characterize these differences between areas in simpler terms by fitting  
329 response curves (response functions). Previous studies that quantified responses of dopamine  
330 neurons to varied amounts of reward under different levels of expectation indicated that their  
331 reward responses can be approximated by a common function, with different levels of  
332 expectation just shifting the resulting curves up and down while preserving the shape (Eshel et  
333 al., 2016). We, therefore, fitted dopamine axon responses with a common response function (a  
334 power or linear function) for each expectation level (i.e. separately for BIG and SMALL) while  
335 fixing the shape of the function (i.e. the exponent of the power function or the slope of the linear  
336 function were fixed, respectively) (Figure 4C, Figure S2A). The obtained response functions for  
337 the three areas recapitulated the main difference between VS, DMS and DLS, as discussed  
338 above. For one, the response curves of DLS are shifted overall upward. This can be characterized  
339 by estimating the amount of water that does not elicit a change in dopamine responses from  
340 baseline firing (“zero-crossing point” or reversal point). The zero-crossing points, obtained from  
341 the fitted curves, were significantly lower in DLS (Figures 4C and 4D). The results were similar  
342 regardless of whether the response function was a power (power function  $\alpha < 1$ ) or a linear  
343 function ( $\alpha = 1$ ) (Figure S2B). Similar results were obtained using the aforementioned kernel  
344 models in place of the actual activity (Figure S2D).

345  
346 Since the recording locations varied across animals, we next examined the relationship between  
347 recording locations and the zero-crossing points (Figures 4E and 4F). The zero-crossing points  
348 varied both along the medial-lateral and the dorsal-ventral axes (linear regression coefficient;  $\beta =$   
349  $-44$  [zero-crossing point water amounts/mm],  $p = 0.008$  for medial-lateral axis;  $\beta = -52$ ,  $p =$   
350  $0.011$  for the dorsal-ventral axis). Examination of each animal confirmed that DMS showed  
351 higher zero-crossing points (upper-left in Figure 4E left) whereas DLS showed lower zero-  
352 crossing points (upper-right cluster in Figure 4E right).

353



354 We next examined whether the difference in zero-crossing points manifested specifically during  
355 reward responses or whether it might be explained by recording artifacts; upward and downward  
356 shifts in the response function can be caused by a difference in baseline activity before trial start  
357 (odor onset), and/or lingering activity of pre-reward activity owing to the relatively slow  
358 dynamics of the calcium signals (a combination of calcium concentration and the indicator). To  
359 examine these possibilities, the same analysis was performed after subtracting the pre-reward  
360 signals (Figure S2C). We observed similar or even bigger differences in zero-crossing points  
361 ( $p=2.2\times 10^{-5}$ , analysis of variance [ANOVA]). These results indicate that the elevated or  
362 decreased responses, characterized by different zero-crossing points, was not due to a difference  
363 in “baseline” but was related to the difference that manifests specifically in responses to reward.

364  
365 Considerably small zero-crossing points in dopamine axons in DLS were not due to a poor  
366 sensitivity to reward amounts nor a poor modulation by expected reward (Figure 4D). Different  
367 zero-crossing points, i.e. shifts of the boundary between excitation and inhibition at reward,  
368 suggest biased representation of TD error in dopamine axons across the striatum. In TD error  
369 models, difference in zero-crossing points may affect not only water responses but also responses  
370 to other events. Thus, the small zero-crossing points in dopamine axons in DLS should yield  
371 almost no inhibition following an event that is worse than predicted. To test this possibility, we  
372 examined responses to events with lower value than predicted (Figure 5): small water (Figures  
373 5A-5C), water omission caused by choice error (Figures 5D-5F), and a cue that was associated  
374 with no outcome (Figures 5G-5I). Consistent with our interpretation of small zero-crossing  
375 points, dopamine axons in DLS did not show inhibition in response to outcomes that were worse  
376 than predicted while being informative about water amounts.

377  
378 Taken together, these results demonstrate that dopamine reward responses in all three areas  
379 exhibited characteristics of RPEs. However, relative to canonical responses in VS, the responses  
380 were shifted more positively in the DLS and more negatively in the DMS.

381

382

383 **TD error dynamics in signaling perceptual uncertainty and cue-associated value**

384

385 The analyses presented so far mainly focused on phasic dopamine responses time-locked to cues  
386 and reward. However, dopamine axon activity also exhibited richer dynamics between these  
387 events, which need to be explained. For instance, the signals diverged between correct and error  
388 trials even before the actual outcome was revealed (a reward delivery versus a lack thereof)  
389 (Figure 2C Choice). This difference between correct and error trials, which is dependent on the  
390 strength of sensory evidence (or stimulus discriminability), was used to study how neuronal  
391 responses are shaped by “confidence”. Confidence is defined as the observer’s posterior  
392 probability that their decision is correct given their subjective evidence and their choice  
393 ( $P(\text{reward}|\text{stimulus}, \text{choice})$ ) (Hangya et al., 2016). A decision model allows the  
394 experimenter to link stimulus discriminability to subjective evidence (Hangya et al., 2016). A  
395 given model and task structure makes specific predictions on the shape of three key signatures  
396 relating stimulus discriminability, choice and confidence. The predictions can vary depending on  
397 task design (Adler and Ma, 2018; Rausch and Zehetleitner, 2019), but the structure of our task  
398 follows the original predictions (Hangya et al., 2016). Additionally, in our task, the mice  
399 combined the information about reward size with the strength of sensory evidence to select an  
400 action (confidence, or uncertainty) (Figure 1). The previous analyses did not address how these  
401 different types of information affect dopamine activity over time. We next sought to examine the  
402 time course of dopamine axon activity in greater detail, and to determine whether a simple model  
403 could explain these dynamics.

404

405 Our task design included two delay periods, imposed before choice movement and water  
406 delivery, to improve our ability to separate neuronal activity associated with different processes  
407 (Figure 1A). The presence of stationary moments before and after the actual choice movement  
408 allows us to separate time windows before and after the animal’s commitment to a certain option.  
409 We examined how the activity of dopamine neurons changed before choice movement and after  
410 the choice commitment (Figure 6).

411

412 We first examined dopamine axon activity after water port entry (0-1 s after water port entry). In  
413 this period, the animals have committed to a choice and are waiting for the outcome to be  
414 revealed. Responses following different odor cues were plotted separately for trials in which the  
415 animal chose the BIG or SMALL side. The psychometric curve (a plot of responses against

416 sensory evidence) followed the expected ‘X-pattern’ with a modulation by reward size  
417 (Hirokawa et al., 2019), which matches the expected value for these trial types, or the size of  
418 reward multiplied by the probability of receiving a reward, given the presented stimulus and  
419 choice (Figure 6C). The latter has been interpreted as the decision confidence,  
420  $P(\text{reward}|\text{stimulus}, \text{choice})$  (Lak et al., 2017, 2020b). The crossing point of the two lines  
421 forming an “X” is shifted to the left in our data because of the difference in the reward size  
422 (Figure 6C).

423  
424 When this analysis was applied to the time period before choice movement (0-1 s before odor  
425 port exit), the pattern was not as clear; the activity was monotonically modulated by the strength  
426 of sensory evidence (%Odor BIG) only for the BIG choice trials, but not for the SMALL choice  
427 trials (Figure 6B). This result is contrary to a previous study that suggested that the dopamine  
428 activity reflecting confidence develops even before a choice is made (Lak et al., 2017). We note,  
429 however, that the previous study only examined the BIG choice trials, and the results were  
430 shown by “folding” the x-axis, that is, by plotting the activity as a function of the stimulus  
431 contrast (which would correspond to  $|\% \text{Odor BIG} - 50|$  in our task), with the result matching the  
432 so-called “folded X-pattern”. We would have gotten the same result, had we plotted our results  
433 in the same manner excluding the SMALL choice trials. Our results, however, indicate that a full  
434 representation of “confidence” only becomes clear after a choice commitment, leaving open the  
435 question what the pre-choice dopamine activity really represents.

436  
437 The aforementioned analyses, using either the kernel regression or actual activity showed that  
438 cue responses were modulated by whether the cue instructed a choice toward the BIG or SMALL  
439 side (Figures 2C and 2F). These results indicate that the information about stimulus-associated  
440 values (BIG versus SMALL) affected dopamine neurons earlier than the strength of sensory  
441 evidence (or confidence). We next examined the time course of how these two variables affected  
442 dopamine axon activity more closely. We computed the dopamine axon activity between trials  
443 when a pure odor instructed to go to the BIG versus SMALL side. Consistent with the above  
444 result, the difference was evident during the cue period, and then gradually decreased after  
445 choice movement (Figure 6D). We performed a similar analysis, contrasting between easy and  
446 difficult trials (i.e. the strength of sensory evidence). We computed the difference between

447 dopamine axon activity in trials when the animal chose the SMALL side after the strongest  
448 versus weaker stimulus evidence (a pure odor that instruct to choose the SMALL side versus an  
449 odor mixture that instruct to choose the BIG side). In stark contrast to the modulation by the  
450 stimulus-associated value (BIG versus SMALL), the modulation by the strength of stimulus  
451 evidence in SMALL trials fully developed only after a choice commitment (i.e. water port entry)  
452 (Figure 6E). Across striatal regions, the magnitude and the dynamics of modulation due to  
453 stimulus-associated values and the strength of sensory evidence were similar (Figures 6F and  
454 6G), although we noticed that dopamine axons in DMS showed slightly higher correlation with  
455 sensory evidence before choice (Figure S3).

456

457 As discussed above, a neural correlate of “confidence” appears at a specific time point (after  
458 choice commitment and before reward delivery) or in a specific trial type (when an animal would  
459 choose BIG side) before choice. We, therefore, next examined whether a simple model can  
460 account for dopamine axon activity more inclusively (Figure 7). To examine how the value and  
461 RPE may change within a trial, we employed a Monte-Carlo approach to simulate animal’s  
462 choices assuming that the animal has already learned the task. We used a Monte-Carlo method to  
463 obtain the ground truth landscape of the state values over different task states, without assuming  
464 a specific learning algorithm.

465

466 The variability and errors in choice in psychophysical performance are thought to originate in the  
467 variability in the process of estimating sensory inputs (perceptual noise) or in the process of  
468 selecting an action (decision noise). We first considered a simple case where the model contains  
469 only perceptual noise (Green and Swets, 1966). In this model, an internal estimate of the  
470 stimulus or a “subjective odor” was obtained by adding Gaussian noise to the presented odor  
471 stimulus on a trial-by-trial basis (Figures 7B left). In each trial, the subject chooses  
472 deterministically the better option (Figure 7C left) based on the subjective odor and the reward  
473 amount associated with each choice (Figure 7B right). The model had different “states”  
474 considering N subjective odors (N = 60 and 4 were used and yielded similar results), the  
475 available options (left versus right), and a sequence of task events (detection of odor, recognition  
476 of odor identity, choice movement, water port entry [choice commitment], Water/No-water  
477 feedback, inter-trial interval [ITI]) (Figure 7A). The number of available choices is two after

478 detecting an odor but reduced to 1 (no choice) after water port entry. In each trial, the model  
479 receives one of the four odor mixtures, makes a choice, and obtains feedback (rewarded or not).  
480 After simulating trials, the state value for each state was obtained as the weighted sum of  
481 expected values of the next states, which was computed by multiplying expected values of the  
482 next states with probability of transitioning into the corresponding state. After learning, the state  
483 value in each state approximates the expected value of future reward, sum of the amount of  
484 reward multiplied by probability of the reward (for simplicity, we assumed no temporal  
485 discounting of value within a trial). After obtaining state values for each state, state values for  
486 each odor (“objective” odor presented by experimenters) was calculated as the weighted sum of  
487 state values over subjective odors. After obtaining state values at each state, we then computed  
488 TD errors using a standard definition of TD error which is the difference between the state values  
489 at consecutive time points plus received rewards at each time step (Sutton and Barto, 1987).

490

491 We first simulated the dynamics of state values and TD errors when the model made a correct  
492 choice in easy trials, choosing either the BIG or SMALL side (Figure 7F bottom, blue versus  
493 red). As expected, the state values for different subjective odors diverged as soon as an odor  
494 identity was recognized, and the differences between values stayed constant as the model  
495 received no further additional information before acquisition of water. TD errors, which are the  
496 derivative of state values, exhibited a transient increase after odor presentation, and then returned  
497 to their baseline levels (near zero), remaining there until the model received a reward. Next, we  
498 examined how the strength of sensory evidence affected the dynamics of value and TD errors  
499 (Figures 7F and 7J). Notably, after choice commitment, TD error did not exhibit the additional  
500 modulation by the strength of sensory evidence, or a correlate of confidence (Figures 7F right  
501 and 7J right), contrary to our data (Figures 7E and 7I right). Thus, this simple model failed to  
502 explain aspects of dopamine axon signals that we observed in the data.

503

504 In the first model, we assumed that the model picks the best option given the available  
505 information in every trial (Figure 7C). In this deterministic model, all of the errors in choice are  
506 attributed to perceptual noise. We next considered a model that included decision noise in  
507 addition to the perceptual noise (Figure 7D). Here decision noise refers to some stochasticity in  
508 the action selection process, and may arise from errors in an action selection mechanism or

509 exploration of different options, and can be modeled using different methods or rationale behind  
510 it. Here we present results based on a “softmax” decision rule, in which a decision variable (in  
511 this case, the difference in the ratio of the expected values at the two options) was transformed  
512 into the probability of choosing a given option using a sigmoidal function (e.g. Boltzmann  
513 distribution) (Sutton and Barto, 2011). We also tested other stochastic decision rules such as  
514 Herrnstein’s matching law (Herrnstein, 1961) or  $\epsilon$ -greedy exploration (randomly selecting an  
515 action in a certain fraction  $[\epsilon]$  of trials) (Sutton and Barto, 2011) (Figures S4A-S4C).

516  
517 Interestingly, just by adding some stochasticity in action selection, various peculiar features of  
518 dopamine axon signals described above were suddenly explained (Figures 7G and 7K). Note that  
519 the main free parameters of the above models are the width of the Gaussian noise, which  
520 determines the “slope” of the psychometric curve, and was chosen based merely on the  
521 behavioral performance, but not the neural data. When the model chose the BIG side, state value  
522 at odor presentation was roughly monotonically modulated by the strength of sensory evidence  
523 similar to the above (Figure 7G top left). When the model chose the SMALL side, however, the  
524 relationship between the strength of sensory evidence and value was more compromised (Figure  
525 7G middle left). As a result, TD error did not show monotonic relationship with sensory  
526 evidence before choice (Figures 7G middle right and 7K left), similar to actual dopamine axons  
527 responses (Figures 7E middle and 7I left), which was reminiscent of reaction time pattern  
528 (Figure 7H). On the other hand, once a choice was committed, the model exhibited interesting  
529 dynamics very different from the above deterministic model. After choice commitment, expected  
530 value was monotonically modulated by the strength of sensory evidence both for the choice to  
531 the BIG and SMALL sides (Figure 7G top and middle left, After). Further, because of the  
532 introduced stochasticity in action selection, the model sometimes chose a suboptimal option,  
533 resulting in a drop in the state value. This, in turn, caused TD error to exhibit an “inhibitory dip”  
534 once the model “lost” a better option (Figure 7G right), similar to the actual data (Figures 7E and  
535 7I). This effect was strong particularly when the subjective odor instructed the BIG side but the  
536 model ended up choosing the SMALL side. For a similar reason, TD error showed a slight  
537 excitation when the model chose a better option (i.e. lost a worse option). The observed features  
538 in TD dynamics were not dependent on exact choice strategy: softmax, matching, and  $\epsilon$ -greedy,  
539 all produced similar results (Figures S4B and S4C). This is because, with any strategy, after

540 commitment of choice, the model loses another option with a different value, which results in a  
541 change in state value. These results are in stark contrast to the first model in which all the choice  
542 errors were attributed to perceptual noise.

543

544 In summary, we found that a standard TD error, computing the moment-by-moment changes in  
545 state value (or, the expected future reward), can capture various aspects of dynamics in dopamine  
546 axon activity observed in the data, including the changes that occur before and after choice  
547 commitment, and the detailed pattern of cue-evoked responses. These results were obtained as  
548 long as we introduced some stochasticity in action selection (decision noise), regardless of how  
549 we did it. The state value dynamically changes during the performance of the task because the  
550 expected value changes according to an odor cue (i.e. strength of sensory evidence and stimulus-  
551 associated values) and the changes in potential choice options. A drop of the state value and TD  
552 error at the time of choice commitment occurs merely because the state value drops when the  
553 model chose an option that was more likely to be an error. Further, a correlate of “confidence”  
554 appears after committing a choice, merely because at that point (and *only* at that point), the state  
555 value becomes equivalent to the reward size multiplied with the confidence, i.e. the probability  
556 of reward given the stimulus and the choice. This means that, as long as the animal has  
557 appropriate representations of states, a representation of “confidence” can be acquired through a  
558 simple associative process or model-free reinforcement learning without assuming other  
559 cognitive abilities such as belief states or self-monitoring (meta-cognition). In total, not only the  
560 phasic responses but also some of the previously unexplained dynamic changes can be explained  
561 by TD errors computed over the state value, provided that the model contains some stochasticity  
562 in action selection in addition to perceptual noise. Similar dynamics across striatal areas (Figure  
563 6) further support the idea that dopamine axon activity follows TD error of state values in spite  
564 of the aforementioned diversity in dopamine signals.

565



## 566 **DISCUSSION**

567

568 In the present study, we monitored dopamine axon activity in three regions of the striatum (VS,  
569 DMS and DLS) while mice performed instrumental behaviors involving perceptual and value-  
570 based decisions. In addition to phasic responses associated with reward-predictive cues and  
571 reward, we also analyzed more detailed temporal dynamics of the activity within a trial. Contrary  
572 to the current emphases on diversity or multiplexing in dopamine signals (and therefore, to our  
573 surprise), we found that dopamine axon activity in all of the three areas exhibited dynamics that  
574 can be explained by the TD error which calculates moment-by-moment “changes” in the  
575 expected future reward (i.e. state value). Interestingly, however, our results showed consistent  
576 differences between regions. First, as reported previously (Parker et al., 2016), during choice  
577 movements, contra-lateral orienting movements caused a transient activation in the DMS. This  
578 response was negligible in VS and DLS, however. Second, although dopamine axon signals  
579 exhibited temporal dynamics that are predicted by TD errors, reward responses were generally  
580 elevated in DLS. As a consequence, dopamine axon signals in DLS did not exhibit a clear  
581 inhibitory response (“dopamine dip”) even when the actual reward was smaller than expected, or  
582 even when the animal did not receive a reward, despite our observations that dopamine axons in  
583 VS and DMS exhibited clear inhibitory responses in these conditions. Overall, the activity during  
584 the reward period was biased toward positive responses in the DLS, compared to other areas.  
585 Activation of dopamine neurons both in VTA and SNc are known to reinforce preceding  
586 behaviors (Ilango et al., 2014; Keiflin et al., 2019; Lee et al., 2020; Saunders et al., 2018). The  
587 differences in dopamine axon signals that we observed in instrumental behaviors can provide  
588 specific constraints on the behaviors learned through dopamine-mediated reinforcement in these  
589 striatal regions.

590

### 591 **Diversity in representation of TD errors**

592

593 Accumulating evidence indicates that dopamine neurons are diverse in various aspects such as  
594 anatomy, physiological properties, and activity (Engelhard et al., 2019; Farassat et al., 2019;  
595 Howe and Dombeck, 2016; Kim et al., 2015; Lammel et al., 2008; Matsumoto and Hikosaka,  
596 2009; Menegas et al., 2015, 2017, 2018; Parker et al., 2016; da Silva et al., 2018; Watabe-Uchida



597 and Uchida, 2018). Our study is one of the first to examine dopamine signals in three different  
598 regions of the striatum during an instrumental behavior involving perceptual and value-based  
599 decisions. We found that dopamine axon activity in the striatum follows TD error dynamics in  
600 our choice paradigm. At the same time, we found that the response function for water delivery in  
601 dopamine axons in different striatal areas showed different zero-crossing points, the boundary  
602 between excitatory and inhibitory responses (Figure 4). The results suggested that dopamine  
603 axons in DMS use a higher boundary (requiring larger amounts of reward to excite), and  
604 dopamine axons in DLS use a lower boundary (requiring smaller amounts of reward to excite).  
605 In other words, dopamine signals in DMS use a strict criterium to be excited, whereas dopamine  
606 signals in DLS tend to be more excited with smaller rewards.

607  
608 A recent study (Dabney et al., 2020) proposed that the diversity in dopamine responses  
609 potentially give rise to a population code for a reward distribution (distributional reinforcement  
610 learning). In this theory, there are optimistic and pessimistic dopamine neurons. Optimistic  
611 dopamine neurons emphasize positive over negative RPEs, and as a consequence, their  
612 corresponding value predictors are biased to predict a higher value in a reward distribution, or  
613 vice versa. The distributional reinforcement learning, as formulated in Dabney et al. (Dabney et  
614 al., 2020), predicts that optimistic and pessimistic dopamine neurons should have zero-crossing  
615 points shifted toward larger and smaller rewards, respectively. In this sense, our observation that  
616 DLS dopamine signals have smaller zero-crossing points resembles pessimistic dopamine  
617 neurons in distributional reinforcement learning, although the previous study found both  
618 optimistic and pessimistic dopamine neurons in the VTA, which does not necessarily project to  
619 the DLS. Whether the present result is related to distributional reinforcement learning requires  
620 more specific tests such as dopamine neurons' sensitivity to positive versus negative RPEs  
621 (Dabney et al., 2020). It will be interesting to characterize these response properties in a  
622 projection-specific manner.

623  
624 Higher criteria in DMS may partly explain the observation that some dopamine neurons do not  
625 show a clear excitation by reward, such as in the case of our recording without reward amount  
626 modulations (Figure 3). Our results suggest that whether dopamine neurons respond to reward  
627 likely depends critically on task structures and training history. It will be important to further

628 examine in what conditions these dopamine neurons lose responses to water, or whether there are  
629 dopamine neurons which do not respond to reward in any circumstances. In contrast to DMS, we  
630 observed reliable excitation to water reward in dopamine axons in DLS. Thus, the previous  
631 observation that some dopamine neurons in the substantia nigra show small or no excitation to  
632 reward (da Silva et al., 2018) may mainly come from DMS-projecting dopamine neurons or  
633 another subpopulation of dopamine neurons that project to the tail of the striatum (TS) (Menegas  
634 et al., 2018), but not DLS. The distinction is important because smaller dopamine responses to  
635 reward have been often linked to skill or habit with value-free mechanism (Miller et al., 2019).  
636 In contrast, we found that dopamine axons in DLS show strong modulation by reward amounts  
637 and prediction, and its dynamics resemble TD errors. Our observation suggests that the lack of  
638 reward omission responses and excitation by even small rewards is a key for the function of  
639 dopamine in DLS.

640

641

#### 642 **Positively biased reinforcement signals in DLS dopamine**

643

644 It has long been observed that the activity of many dopamine neurons exhibits a phasic inhibition  
645 when an expected reward was omitted or when the reward received was smaller than expected  
646 (Hart et al., 2014; Schultz et al., 1997). This inhibitory response to negative RPEs is one of the  
647 hallmarks of dopamine RPE signals. Our results that DLS dopamine signals largely lack these  
648 dopamine dips (Figure 4 and Figure 5) has profound implications on what types of behaviors are  
649 learned through DLS dopamine signals as well as what computational principles underlie  
650 reinforcement learning in DLS.

651

652 Dopamine “dips” are thought to act as aversive stimuli and/or can facilitate extinction of  
653 previously learned behaviors (weakening) (Chang et al., 2018; Montague et al., 1996; Schultz et  
654 al., 1997). The lack of dopamine dip in DLS may lead to the animal’s reduced sensitivity to  
655 worse-than-expected outcome (i.e. negative prediction error). This characteristic resembles the  
656 activity of dopamine axons in TS, posterior to DLS, which signals potential threat and also lacks  
657 inhibitory responses to an omission of a predicted threat (Menegas et al., 2017, 2018). We  
658 proposed that the lack of inhibitory omission signals (and so lack of weakening signals) would

659 be critical to maintain threat prediction even if an actual threat is sometimes omitted. Similarly,  
660 the lack of weakening signals in DLS may help keep the learned actions from being erased even  
661 if the outcome is sometimes worse than predicted or even omitted. This idea is in line with the  
662 previous observations that DLS plays an important role in habitual behaviors (Yin et al., 2004).  
663 The uniquely modified TD error signal in DLS (i.e. a reduced inhibitory response during the  
664 reward period) may explain a predominant role of DLS in controlling habitual behaviors.

665

### 666 **What is learned in the DLS? “The law of exercise” and learning sequences.**

667

668 A deeper understanding of the nature of reinforcement signals can constrain the search for  
669 computational principles and provide critical insight into what is actually learned by the system.  
670 Here we speculate on these questions in the light of reinforcement learning theories and  
671 anatomy.

672

673 Thorndike (Thorndike, 1932) proposed three principles for instrumental learning – the law of  
674 effect, the law of readiness, and the law of exercise. The law of effect emphasizes the role of  
675 outcome of behaviors: behaviors that led to good outcomes become more likely to occur – the  
676 idea that is a foundation of value-based reinforcement learning. In contrast, the law of exercise  
677 emphasizes the number of times a particular action was taken. There has been an increasing  
678 appreciation of the law of exercise because repetition or overtraining is the hallmark of habits  
679 and skills (Hikosaka et al., 1995; Matsuzaka et al., 2007; Miller et al., 2019; Morris and  
680 Cushman, 2019; Ölveczky, 2011; Robbins and Costa, 2017; Smith and Graybiel, 2016). Here we  
681 propose that dopamine signals in DLS provide an ideal neural substrate of learning with an  
682 emphasis on the law of exercise. A positively biased TD error signals ensures that an "OK"  
683 action will be positively reinforced, in a manner that depends on the number of times that the  
684 same behavior was repeated as far as it is accompanied by a small reward (i.e. with "OK"  
685 signals). This property may explain why the formation of habit (and skills) normally requires  
686 overtraining (i.e. repeating a certain behavior many times).

687

688 The observation that DLS dopamine signals lack inhibitory responses raises the question what is  
689 actually learned by the system. Learning of values depends on the balance between positive and

690 negative prediction errors: the learned value converges to the point at which positive and  
691 negative prediction errors form an equilibrium. If a reinforcement signal lacks negative  
692 prediction errors, this learning would no longer work as it was originally conceptualized. In  
693 reinforcement learning theories, an alternative approach is policy-based reinforcement learning.  
694 We propose that policy learning may be a better way to conceptualize the function of the DLS. In  
695 reinforcement learning, a policy is a set of rules that map an action to a state, and has direct  
696 relevance to stimulus-response associations that are proposed to underlie habit because the  
697 relationship between stimulus (state) and response (action) can be more directly encoded using a  
698 policy. According to Sutton and Barto (Sutton and Barto, 2018), policy learning can be done by  
699 learning what is called “preference”,  $h(s, a)$ , which defines the likelihood of a certain action,  $a$ ,  
700 in a given state,  $s$ . In a given state, an action is selected based on preference through a winner-  
701 take-all mechanism either deterministically (e.g. by selecting the action with the maximum  
702 preference) or stochastically (e.g. through a softmax action selection). One way to conceptualize  
703 preference is to see it as a generalized version of value, which has less constraints than value (the  
704 idea of “value” may imply many properties that it should follow, e.g. the value should be zero for  
705 no outcome). Alternatively,  $h(s, a)$  can directly encode the probability of an action.

706  
707 It is also important to consider what are “states” for learning in DLS. Importantly, the main  
708 inputs to DLS come from the motor cortex, somatosensory cortex, and other subcortical areas  
709 such as intralaminar nuclei in thalamus (Hunnicutt et al., 2016). Thus, the inputs to DLS may not  
710 be dominated by the sensory information representing the external world, as often  
711 conceptualized in reinforcement learning. Instead, DLS is well-positioned to receiving inputs  
712 representing motor commands (the current “motor states”) or somatosensory information (the  
713 current “bodily states” consisting of proprioception, sense of touch etc.). In other words, DLS  
714 may compute their output by monitoring the current motor and bodily states. Dopamine in DLS  
715 can thus be conceptualized as a reinforcement signal that strengthens the connection between the  
716 current motor/bodily state and the next motor output. This mechanism, when chained, can  
717 produce a sequence of movements as long as the same motor/bodily state is revisited or  
718 reproduced, which may not occur easily at the beginning but can occur after repeated training.  
719 As such, DLS may regulate “how” to perform a sequence of well-trained movements smoothly  
720 and automatically. The key properties of habits and skills such as stereotypy, automaticity and

721 the requirement of overtraining, can be explained by this model. In this model, the learning of  
722 habits and skills are a natural consequence of reinforcement learning using a specialized  
723 reinforcement signals (positively shifted response to outcomes) and the unique anatomical  
724 property (the specialized input suitable for chaining actions) of the DLS. Future experiments  
725 using tasks involving sequence of actions (Hikosaka et al., 1995; Ölveczky, 2011) can test this  
726 idea.

727

## 728 **Potential mechanisms underlying diverse TD error signals**

729

730 We found that, across the striatum, dopamine signals overall resemble TD errors, with positive  
731 or negative biases in a subregion-specific manner (Figure 4). A potential mechanism to generate  
732 such a diversity is by optimistic and pessimistic expectations, as proposed in distributional  
733 reinforcement learning (Dabney et al., 2020). Alternatively, DLS-projecting dopamine neurons  
734 may add "success premium" at each feedback. Signals of success feedback were observed in  
735 multiple cortical areas (Chen et al., 2017; Sajad et al., 2019; Stuphorn et al., 2000), which is  
736 often more sustained than phasic dopamine responses. Interestingly, we noticed that responses to  
737 water in dopamine axons in DLS are more sustained than dopamine axons in other areas (Figure  
738 4A). DLS-projecting dopamine neurons potentially receive and integrate those success feedback  
739 signals with reward value, shifting the teaching signals more positively.

740

741 Mechanistically, biases in dopamine signals may stem from a difference in the excitation-  
742 inhibition balance at the circuit level. In addition to dopamine neurons, there are multiple brain  
743 areas where activity of some neurons resembles RPE (Li et al., 2019; Matsumoto and Hikosaka,  
744 2007; Oyama et al., 2010; Tian et al., 2016). Among these, presynaptic neurons in multiple brain  
745 areas directly convey a partial prediction error to dopamine neurons (Tian et al., 2016). On the  
746 other hand, rostromedial tegmental area (RMTg) exhibits a flipped version of RPE (the sign is  
747 opposite to dopamine neurons), and its inhibitory neurons directly project to dopamine neurons  
748 in a topographic manner (Hong et al., 2011; Jhou et al., 2009a, 2009b; Li et al., 2019; Tian et al.,  
749 2016). Hence, each dopamine neuron may receive a different ratio of excitatory and inhibitory  
750 inputs of RPE. It would be interesting if DLS-projecting dopamine neurons receive less  
751 inhibitory RPE, and DMS-projecting dopamine neurons receive more, so that RPE signals are

752 pushed up or down, whereas the information is still almost intact. In addition to anatomical  
753 reasons, DLS-projecting dopamine neurons show higher burstiness in intact animals (Farassat et  
754 al., 2019) and higher excitability *in vitro* (Evans et al., 2017; Lerner et al., 2015). These multiple  
755 reasons may explain why DLS-projecting dopamine neurons do not show inhibitory responses to  
756 negative prediction errors. It will be fascinating if we could connect all these levels of studies  
757 into functional meaning in the future.

758

### 759 **Future directions to understand the meaning of diversity of dopamine signals**

760

761 Recent studies reported that dopamine neurons are modulated by various parameters (Engelhard  
762 et al., 2019; Watabe-Uchida and Uchida, 2018). Here, we found that TD error dynamics can  
763 inclusively explain two seemingly separate decision variables, namely, stimulus-associated value  
764 and choice accuracy when animal's choice strategy is not deterministic (i.e. there is decision  
765 noise) (Figure 6). At a glance, dopamine activity patterns may appear to be signaling two distinct  
766 variables at different timings, but both are inclusively explained by a single quantity (TD error)  
767 in one framework (Figure 7). These results underscore the importance of considering moment-  
768 by-moment dynamics, and underlying computation. Taken together, our results showed that  
769 dopamine axon signals in the striatum approximate TD error dynamics. We propose that  
770 dopamine in different striatal areas conveys TD errors in a biased manner. One compelling idea  
771 is that the lack of negative teaching signals in DLS plays a role in skill/habit, although further  
772 examination is needed to establish its functions. Although we designed the task to minimize  
773 effects of movement itself on results, accumulating studies suggested close relationship between  
774 dopamine signaling and movement (Howe and Dombeck, 2016; da Silva et al., 2018). It is  
775 important to test these other parameters in the future in order to understand the meaning of the  
776 diversity of dopamine neurons and organization of dopamine-striatum systems.

777

778

779

780

781

## 782 **EXPERIMENTAL PROCEDURES**

783

### 784 **Animals**

785 17 dopamine transporter (DAT)-cre (B6.SJL-Slc6a3tm1.1(cre)Bkmn/J, Jackson Laboratory;  
786 RRID:IMSR JAX:006660) (Bäckman et al., 2006) heterozygous mice, and 5 DAT-Cre;Ai14  
787 (Rosa-CAG-LSL-tdTomato, Jackson Laboratory; RRID:IMSR JAX:007914) (Madisen et al.,  
788 2010) double heterozygous mice, male and female, were used for recording signals from  
789 dopamine axons. All mice were backcrossed with C57BL/6J (Jackson Laboratory). Animals  
790 were housed on a 12 hour dark/12 hour light cycle (dark from 07:00 to 19:00) and performed a  
791 task at the same time each day. All procedures were performed in accordance with the National  
792 Institutes of Health Guide for the Care and Use of Laboratory Animals and approved by the  
793 Harvard Animal Care and Use Committee.

794

### 795 **Surgical Procedures**

796 All surgeries were performed under aseptic conditions with animals anesthetized with isoflurane  
797 (1–2% at 0.5–1.0 l/min). Analgesia was administered pre (buprenorphine, 0.1 mg/kg, I.P) and  
798 postoperatively (ketoprofen, 5 mg/kg, I.P). To express GCaMP7f (Dana et al., 2019) specifically  
799 in dopamine neurons, we unilaterally injected 300 nl of mixed virus solution; AAV5-CAG-  
800 FLEX-GCaMP7f ( $1 \times 10^{12}$  particles/ml, UNC Vector Core, NC) and AAV5-CAG-FLEX-  
801 tdTomato ( $2 \times 10^{13}$  particles/ml, UNC Vector Core, NC) into both the VTA and SNc (600 nl  
802 total) in the DAT-cre mice. Only AAV5-CAG-FLEX-GCaMP7f (300 nl total) was used for  
803 DAT;Ai14 double transgenic mice. Virus injection lasted around 20 minutes, and then the  
804 injection pipette was slowly removed over the course of several minutes to prevent damage to  
805 the tissue. We also implanted optic fibers (400  $\mu$ m diameter, Doric Lenses, Canada) into the VS,  
806 DMS, or DLS (1 fiber per mouse). To do this, we first slowly lowered optical fibers into the  
807 striatum. Once fibers were lowered, we first attached them to the skull with UV-curing epoxy  
808 (NOA81, Thorlabs, NJ), and then a layer of rapid-curing epoxy to attach the fiber cannulas even  
809 more firmly to the underlying glue. After waiting 15 minutes for this to dry, we applied a black  
810 dental adhesive (Ortho-Jet, Lang Dental, IL). We used magnetic fiber cannulas (Doric Lesnses,  
811 MFC\_400/430) and the corresponding patch cords to allow for recordings in freely moving



812 animals. After waiting 15 minutes for the dental adhesive to dry, the surgery was complete. We  
813 used the following coordinates to target our injections and implants.

814

- 815 - (VTA) Bregma: -3.0 mm, Lateral: 0.6 mm, Depth: between 4.5 mm and 4.3 mm
- 816 - (SNc) Bregma: -3.0 mm, Lateral: 1.6 mm, Depth: between 4.3 mm and 4.1 mm
- 817 - (VS) Bregma: between 1.5 mm and 1.0 mm, Lateral: 1.8 mm, Depth: 3.8 mm, angle 10°
- 818 - (DMS) Bregma: between 1.5 mm and 0 mm, Lateral: 1.3 mm, Depth: 2.3 mm
- 819 - (DLS) Bregma: between 1.3 mm and -0.8 mm, Lateral: 3.0 mm, Depth: 2.3 mm

820

### 821 **Behavioral tasks**

822 All behavioral experiments were performed in custom-built behavioral rigs and controlled by a  
823 NIDAQ board (National Instruments, TX) and Labview (National Instruments, TX), similar to a  
824 previous study (Uchida and Mainen, 2003). Mice were trained to perform an odor-discrimination  
825 task for water reward, similar to a study in rats (Uchida and Mainen, 2003) with several  
826 modification. Mice initiated trials in a self-paced manner by poking a center port, which then  
827 delivered an odor. Different odors were used in a pseudorandomized order from 3 different pure  
828 chemicals (odor A, B and C) and mixtures of odor A and B with various ratios. Mice were  
829 required to choose a left or right water port depending on dominant odor identity, odor A or B.  
830 Correct choice was always rewarded by a drop of water. Odor C was never associated with  
831 outcomes. To isolate cue- and water-related signals from potential motion artifacts in recording  
832 and motor-related activity, mice were required to stay in an odor port for at least 1 s, and then to  
833 stay in a water port for 1 s to get water reward. The inter-trial-interval was fixed at 7 s after water  
834 onset in correct trials and at 9 s after any types of an error including violation of the stay  
835 requirement, no choice within 5 s after odor port out, and multiple pokes of an odor port after  
836 odor delivery. 1-Butanol, eugenol and cymene were diluted in 1/10 with mineral oil and  
837 randomly assigned to odor A, B or C across animals. The odor-port assignment (left or right) was  
838 held constant in a single animal.

839

840 Mice were first trained only with pure odors and with the same amounts of water reward (~6 ul).  
841 After mice achieved greater than 90% accuracy, mice received a surgery for viral injection and  
842 fiber implantation. Following a 1-week recovery period, mice received re-training and then,



843 mixtures of odor A and B (100/0, 90/10, 65/35, 35/65, 10/90, 0/100) were gradually introduced.  
844 After the accuracy of all the mixture odors achieved more than 50%, neuronal recording with  
845 fiber fluorometry was performed for 5 sessions. Subsequently, a task with different amounts of  
846 water was introduced. Mixtures of odor A and B (100/0, 65/35, 35/65, 0/100) but no odor C were  
847 used in this task. Each recording session started with 88-120 trials with an equal amount of water  
848 (~6  $\mu$ l, the standard amount) in the first block to calibrate any potential bias on the day. In the  
849 second block, different amounts of reward were delivered in each water port. In order to make  
850 the water amounts unpredictable, one water port delivered big or medium size of water (2.2 and  
851 0.8 times of the standard, ~13.2 and 4.8  $\mu$ l, BIG side) in a pseudo-random order, and another  
852 water port delivered medium or small size of water (0.8 and 0.2 times of the standard, ~4.8 and  
853 1.2  $\mu$ l, SMALL side) in a pseudo-random order. Block 2 continued for 200 trials or until the end  
854 of recording sessions, whichever came earlier. A mouse performed  $134.3 \pm 3.4$  (mean  $\pm$  SEM)  
855 trials in block 2. The water condition (BIG or SMALL) was assigned to a left or right water port  
856 in a pseudo-random order across sessions. Recording was conducted for 40 min every other day  
857 to avoid potential bleaching. On days with no recording, animals were trained with pure odors A  
858 and B with the standard amount of water.

859

## 860 **Fiber photometry**

861 Fiber fluorometry (photometry) was performed as previously reported (Menegas et al., 2018)  
862 with a few modification. The optic fiber (400  $\mu$ m diameter, Doric Lenses) allows chronic, stable,  
863 minimally disruptive access to deep brain regions and interfaces with a flexible patch cord (Doric  
864 Lenses, Canada) on the skull surface to simultaneously deliver excitation light (473 nm,  
865 Laserglow Technologies, Canada; 561 nm, Opto Engine LLC, UT) and collect GCaMP and  
866 tdTomato fluorescence emissions. Activity-dependent fluorescence emitted by cells in the  
867 vicinity of the implanted fiber's tip was spectrally separated from the excitation light using a  
868 dichroic, passed through a single band filter, and focused onto a photodetector connected to a  
869 current preamplifier (SR570, Stanford Research Systems, CA). During recording, optic fibers  
870 were connected to a magnetic patch cable (Doric Lenses, MFP\_400/430) which delivered  
871 excitation light (473 nm and 561 nm) and collected all emitted light. The emitted light was  
872 subsequently filtered using a 493/574 nm beam-splitter (Semrock, NY) followed by a  $500 \pm 20$   
873 nm (Chroma, VT) and  $661 \pm 20$  nm (Semrock, NY) bandpass filters and collected by a

874 photodetector (FDS10x10 silicone photodiode, Thorlabs, NJ) connected to a current preamplifier  
875 (SR570, Stanford Research Systems, CA). This preamplifier output a voltage signal which was  
876 collected by a NIDAQ board (National Instruments, TX) and Labview software (National  
877 Instruments, TX).

878

## 879 **Histology**

880 Mice were perfused using 4% paraformaldehyde and then brains were sliced into 100  $\mu\text{m}$  thick  
881 coronal sections using a vibratome and stored in PBS. Slices were then mounted in anti-fade  
882 solution (VECTASHIELD anti-fade mounting medium, H-1000, Vector Laboratories, CA) and  
883 imaged using a Zeiss Axio Scan Z1 slide scanner fluorescence microscope (Zeiss, Germany).

884

## 885 **Behavior analysis**

886 We fitted % of odor mixture ( $X$ ) to % of choice left or choice BIG ( $\mu$ ) using generalized linear  
887 model with logit link function in each animal as previously reported (Uchida and Mainen, 2003).

$$888 \log(\mu/(1-\mu)) = Xb_1 + b_0$$

889 We first fitted a control block (block 1) and a reward-manipulation block (block 2) separately to  
890 examine difference of a slope,  $b_1$  and a bias,  $50-b_0/b_1$  of the curve. Next, to quantify shift of  
891 choice bias, we fitted choice of block 1 and block 2 together with a fixed slope, by fitting odor  
892 ( $X_1$ ) and a block type ( $X_2=0$  for block 1,  $X_2=1$  for block 2) to choice.

$$893 \log(\mu/(1-\mu)) = X_1b_1 + X_2b_2 + b_0$$

894 Choice bias in block 2 was quantified choice bias as a lateral shift of the psychometric curve  
895 equivalent to % mixture of odors,  $50 - (b_0 + b_2)/b_1$ , which is a lateral shift compared to no bias,  
896 and  $b_0/b_1 - (b_0 + b_2)/b_1$ , which is a lateral shift compared to choice in block 1.

897

## 898 **GCaMP detection and analysis**

899 To synchronize behavioral events and fluorometry signals, TTL signals were sent every 10 s  
900 from a computer that was used to control and record task events using Labview, to a NIDAQ  
901 board that collects fluorometry voltage signals. GCaMP and tdTom signals were collected as  
902 voltage measurements from current preamplifiers. Green and red signals were cleaned by  
903 removing 60Hz noise with bandstop FIR filter 58-62Hz and smoothing with moving average of  
904 signals in 50ms. The global change within a session was normalized using a moving median of

905 100s. Then, the correlation between green and red signals during ITI was examined by linear  
906 regression. If the correlation is significant ( $p < 0.05$ ), fitted tdTom signals were subtracted from  
907 green signals.

908  
909 Responses were calculated by subtracting the average baseline activity from the average activity  
910 of the target window. Unless specified otherwise, odor responses were calculated by averaging  
911 activity from 1-0 s before odor port out (before choice) minus the average activity from the  
912 baseline period (1-0.2 s before odor onset). Responses after choice were calculated by averaging  
913 activity from 0-1 s after water port in minus the same baseline. Outcome responses were  
914 calculated by averaging activity from 0-1 s after water onset minus the same baseline. When  
915 comparing activity before and after water onset, average activity in 1-0.2 s before water onset  
916 was used as baseline. To normalize GCaMP signals across sessions within an animal, GCaMP  
917 signals were divided by average of peak responses during 1 s after odor onset in all the  
918 successful trials in the session. Z-scores of the signals were obtained using mean and standard  
919 deviation of signals in all the choice trials (from 2 s before odor onset to 6 s after odor onset) in  
920 each animal.

921  
922 We built a regularized linear regression to fit cosine kernels (Park et al., 2014) (width of 200 ms,  
923 interval of 40 ms) to the activity of dopamine axons in each animal. We used down-sampled  
924 (every 20 ms) responses in all valid choice trials (trials with  $>1$ s odor sampling time and any  
925 choice, -1 to 7 s from odor onset) for the model fitting. We used 4 different time points to lock  
926 kernels: odor onset ("odor"), odor port out ("movement"), water port in ("choice"), and water  
927 onset ("water"). Odor kernels consist of 4 types of kernels: "base" kernels to span -960 to 200 ms  
928 from odor onset in all trials, and "pure big" kernels in trials with a pure odor associated with  
929 big/medium water, "pure small" kernels in trials with a pure odor associated with medium/small  
930 water, and "mixture" kernels in trials with a mixture odor to span 0-1600 ms from odor onset.  
931 Movement kernels consist of 2 types of kernels: "contra turn" kernels in trials with choice contra-  
932 lateral to the recording site, and "ipsi turn" kernels in trials with choice ipsi-lateral to the  
933 recording site to span -1000 to 1200 ms from when a mouse exited an odor port. Choice kernels  
934 consist of 3 types of kernels: "correct big" kernels in trials with correct choice of medium/small  
935 water and "correct small" kernels in trials with correct choice of medium/small water to span -

936 400 to 1200 ms from when a mouse entered a water port (water port in), and "error" kernels in  
937 trials with choice error to span -400 to 5200 ms from water port in. Water kernels consist of 4  
938 types of kernels: "big water" kernels for big size of water, "medium water big side" kernels for  
939 medium size of water at a water port of big/medium water, "medium water small side" kernels  
940 for medium size of water at a water port of medium/small water, and "small water" for small size  
941 of water to span 0-4200 ms after water onset. All the kernels were fitted to responses using linear  
942 regression with Lasso regularization with 10-fold cross validation. Regularization coefficient  
943 lambda was chosen so that cross-validation error is minimum plus one standard deviation. %  
944 explained by a model was expressed as reduction of a variance in the residual responses  
945 compared to the original responses. Contribution of each component in the model was measured  
946 by reduction of a deviance compared to a reduced model excluding the component.

947

948 We estimated response function to water in dopamine axons with linear regression with power  
949 function in each animal.

$$950 \quad r = k(R^\alpha + c1 * S + c2)$$

951 where r is the dopamine axon response to water, R is the water amount, S is SMALL side (S=1  
952 when water was delivered at SMALL side, S=0 otherwise). There are 4 different conditions,  
953 responses to big and medium water at a port of BIG side, and to medium and small water at a  
954 port of SMALL side. We first optimized  $\alpha$  by minimizing average of residual sum of squares for  
955 each animal and then applied  $\alpha = 0.7$  for all the animals to obtain other parameters, k, c1, and c2.  
956 The response function was drawn with R as x-axis and r as y-axis. The amount of water to which  
957 dopamine axons do not respond under expectation of BIG or SMALL water was estimated by  
958 getting a crossing point of the obtained response function where the value is 0 (a zero-crossing  
959 point). The distribution of zero-crossing points was examined by linear regression of zero-  
960 crossing values against anatomical locations (anterior-posterior, dorsal-ventral, and medial-  
961 lateral). To visualize zero crossing points on the atlas, zero-crossing values were fitted against  
962 anatomical locations with interaction terms using linear regression with elastic net regularization  
963 ( $\alpha=0.1$ ) with 3-fold cross validation. The constructed map was sliced at a coronal plane Bregma  
964 +0.7 and overlaid on an atlas (Paxinos and Franklin, 2019).

965

966 To visualize activity pattern in multiple time windows at the same time, we stretched activity in  
967 each trial to standard windows. Standard windows from odor onset to odor poke out, and from  
968 odor poke out to water poke in, were determined by median reaction time and median movement  
969 time for each animal. For average plots of multiple animals, windows were determined by the  
970 average of median reaction times and of median movement times in all animals. The number of  
971 100ms bins in each time window was determined by dividing median reaction time and median  
972 movement time by 100. Dopamine responses in the window were divided into the bin number  
973 and the average response in each bin was stretched to 100ms. The stretched activity patterns  
974 were used only for visualization, and all the statistical analyses were performed using original  
975 responses.

976

### 977 **Estimation of state values and TD errors using simulations**

978 To examine how the value and RPE may change within a trial, we employed a Monte-Carlo  
979 approach to simulate animal's choices at a steady state (i.e. after the animal learned the task). We  
980 used a Monte-Carlo approach to obtain the *ground truth* state values as the animal progresses  
981 through task events without assuming a specific learning algorithm, under the assumption that  
982 the animal has learned the task. After obtaining the state values, we computed TD errors over the  
983 obtained state values.

984

### 985 *Model architecture*

986 We considered two types of models. The variability and errors in choice in psychophysical  
987 performance can arise from at least two noise sources; noise in the variability in the process of  
988 estimating sensory inputs (perceptual noise) and noise in the process of selecting an action  
989 (decision noise). The first model contained only perceptual noise (Green and Swets, 1966), and  
990 the second model contained both perceptual and decision noise.

991

992 These models had different “states” considering  $N_S$  subjective odors ( $N_S = 60$  or 4 discrete  
993 states), choice (BIG versus SMALL), and different timing (inter-trial interval, odor port entry,  
994 odor presentation, choice, water port in, waiting for reward, and receiving feedback/outcome)  
995 (circles in Figure 7A).

996

997 We assumed  $N_S$  possible subjective odor states ( $O'$ ) which comprise SubOdor1 and SubOdor2  
998 states. We assumed that, in each trial, an internal estimate of the stimulus or a “subjective odor”  
999 ( $O'$ ) was obtained by adding a noise to the presented odor stimulus ( $O$ ) (one of the 4 mixtures of  
1000 Odor A and B; 100/0, 65/35, 35/65, 0/100) (Figure 7A-C). In the model, the probability of falling  
1001 on a given subjective odor state ( $O'$ ) is calculated using a Gaussian distribution centering on the  
1002 presented odor ( $O$ ) with the standard deviation,  $\sigma$ . We considered two successive states for  
1003 subjective odor states in order to reflect a relatively long duration before an odor port exit.

1004

1005 As in the behavioral paradigm, whether the model receives a reward or not was determined  
1006 solely by whether the presented odor ( $O$ ) instructed the BIG side or SMALL side. Each  
1007 subjective odor state contains cases when the presented odor ( $O$ ) is consistent or congruent with  
1008 the subjective odor ( $O'$ ). For each subjective odor state, the probability of receiving a reward  
1009 after choosing the BIG side,  $p(BIG \text{ is correct}) = f_B$ , can be calculated as the fraction of cases  
1010 when the presented odors instructed the BIG side. Conversely, the probability of reward after  
1011 choosing the SMALL side is  $p(SMALL \text{ is correct}) = f_S = 1 - f_B$ . Note that neither  $f_B$  nor  $f_S$   
1012 depends on reward size manipulations (as will be discussed later, the animal’s choices will be  
1013 dependent on reward size manipulations).

1014

1015 *Action selection*

1016 For each subjective odor, the model chose either the BIG or the SMALL side based on the value  
1017 of choosing the BIG or SMALL side ( $V_B$  and  $V_S$  respectively, equivalent to the state value of the  
1018 next state after committing to choose the BIG or SMALL side; see below for how  $V_B$  and  $V_S$   
1019 were obtained). In the first model which contains only perceptual noise, the side that is  
1020 associated with a larger value is chosen. In the second model which contains both perceptual and  
1021 decision noise, a choice is made by transforming  $V_B$  and  $V_S$  into the probability of choosing a  
1022 given option using a sigmoidal function (e.g. Boltzmann distribution) (Sutton and Barto, 2011).  
1023 In the softmax, the probabilities of choosing the BIG and SMALL side ( $P_B$ ,  $P_S$ ) are given,  
1024 respectively, by,

$$1025 \quad P_B = \frac{e^{(V_B/(V_B+V_S))/\tau}}{e^{(V_B/(V_B+V_S))/\tau} + e^{(V_S/(V_B+V_S))/\tau}}$$

1026

$$P_S = 1 - P_B$$

1027 We also tested other stochastic decision rules such as Herrnstein's matching law (Herrnstein,  
1028 1961) or  $\epsilon$ -greedy exploration (randomly selecting an action in a certain fraction  $[\epsilon]$  of trials)  
1029 (Sutton and Barto, 2011). In Herrnstein's matching law, the probability of choosing the BIG side  
1030 is given by,

$$P_B = \frac{V_S}{V_S + V_B}$$

1031  
1032  
1033 The perceptual noise and a set of decision rule determine the behavioral performance of the  
1034 model. The first model has only one free parameter,  $\sigma$ . The second model has one or no  
1035 additional parameter ( $\tau$  for softmax, or  $\epsilon$ , for  $\epsilon$ -greedy; no additional parameter for matching).  
1036 We first obtained the best fit parameter(s) based on the behavioral performance of all animals  
1037 (the average performance in Block 2; i.e. Figure 1C, orange) by minimizing the mean squared  
1038 errors in the psychometric curves.

1039  
1040 For the first model, the best fit  $\sigma$  was 21% Odor. We also tested with  $\sigma$  of 5%, and the TD error  
1041 dynamic was qualitatively similar. For the second model using the softmax rule, the best fit  $\tau$   
1042 was 0.22 while  $\sigma$  was 18% Odor.

1043  
1044 *State values*

1045 The state value for each state was obtained as the weighted sum of expected values of available  
1046 options which was computed by multiplying expected values of the option with probability of an  
1047 option in the next step.

1048  
1049 Outcome2 state represents the timing when the animal recognizes the amount of water. The state  
1050 value is given by the amount of water that the model received (big, medium, small),

$$1051 \quad V_b = 2.2^\alpha$$

$$1052 \quad V_m = 0.8^\alpha$$

$$1053 \quad V_s = 0.2^\alpha$$

1054 where the exponent  $\alpha = 0.7$  makes the value function a concave function of reward amounts,  
1055 similar to the fitting analysis of the fluorometry data (Figure 4C). Using  $\alpha = 1$  (i.e. a linear  
1056 function) did not change the results.



1057

1058 Outcome1 state, or Water/No-water states (W and N, respectively) represent when the animal  
1059 noticed the presence or absence of reward, respectively, but not the amount of reward. The value  
1060 of a W (Water) state was defined by the average value of the next states. At the BIG side,

$$1061 \quad V_{WB} = (V_b + V_m)/2$$

1062

1063 whereas at the SMALL side,

$$1064 \quad V_{WS} = (V_m + V_s)/2$$

1065 The values of N (No-water) states at the BIG and SMALL side are zero,

$$1066 \quad V_{NB} = 0$$

$$1067 \quad V_{NS} = 0$$

1068

1069 WaterPort1 and WaterPort2 states represent when the animal entered and stayed in the water  
1070 port, respectively. The state value was obtained separately for the BIG and SMALL side. The  
1071 value of choosing the BIG and SMALL sides is given by weighted sum of the values of the next  
1072 states ( $V_{WB}$ ,  $V_{NB}$ ,  $V_{WS}$ ,  $V_{NS}$ ). The probabilities of transiting to the W and N states are given by the  
1073 probability of receiving a reward given the choice (BIG or SMALL). As discussed above, these  
1074 probabilities are given by  $f_B$  and  $f_S$ , respectively. Thus,

$$1075 \quad V_B = f_B \cdot V_{WB}$$

$$1076 \quad V_S = f_S \cdot V_{WS}$$

1077 We considered two successive states for WaterPort states to reflect a relatively long duration  
1078 before receiving feedback/outcome. The two successive states had the same state values.

1079

1080 SubOdor1 and SubOdor2 states represent when the animal obtained a subjective odor (O') and  
1081 before making a choice. The model chooses the BIG or SMALL side with the probability of  
1082  $P_B$  and  $P_S$ , respectively, as defined above. Therefore, the state value of WaterPort1 and  
1083 WaterPort2 was defined by the weighted sum of the values of the next states ( $V_B$  and  $V_S$ ),

$$1084 \quad V_{O'} = P_B V_B + P_S V_S$$

1085 The two successive states had the same state values.

1086



1087 OdorOn state represents when the animal recognized the presentation of an odor but before  
1088 recognizing the identity of that odor. The state value of the OdorOn state is defined by the  
1089 weighted sum of the values of the next states (SubOdor1).

1090

1091 ITI state represents when the animal is in the inter-trial interval (i.e. before odor presentation).

1092 The value of ITI state was set to zero.

1093

1094 *TD errors*

1095 After obtaining state values at each state, we then computed TD errors using a standard  
1096 definition of TD error which is the difference between the state values at consecutive time points  
1097 plus received rewards at each time step (Sutton and Barto, 1987). For simplicity, a discounting  
1098 factor was set to 1 (no discounting).

1099

1100 *Invalid trials*

1101 We also tested the effect of including invalid trials. At water acquisition, we included failures  
1102 (20% of trials, value 0) where a mouse did not fulfil the requirement of odor poke duration (short  
1103 odor poke), but did indicate a choice. At an odor port, failures resulted from multiple pokes of  
1104 odor port (4% of trials), and a short odor poke (14% of trials). Values for these failures were set  
1105 to 0. Existence or omission of these failures in models did not change the conclusion.

1106

1107 **Randomization, blinding, and data exclusion**

1108 Chemicals were randomly assigned to an odor cue. Trial types (odors) were pseudorandomized  
1109 in a block. Session types were pseudorandomized in a recording schedule. Animals were  
1110 randomly assigned to a recording location. The experimenter did not know location of recording  
1111 until the recording schedule was completed. No animals were excluded from the study: all  
1112 analysis includes data from all animals. No trials were excluded from statistical analyses. To  
1113 visualize average activity pattern in a stretched time-window, outlier trials (maximum, minimum  
1114 or average activity of a trial is outside of  $3 \times$  standard deviation of maximum, minimum or  
1115 average activity of all the trials) were excluded.

1116

1117 **Statistical analyses**

1118 Data analysis was performed using custom software written in Matlab (MathWorks, Natick, MA,  
1119 USA). All code used for analysis is available on request. All statistical tests were two-sided. For  
1120 statistical comparisons of the mean, we used one-way ANOVA and two-sample Student's t tests,  
1121 unless otherwise noted. Paired t tests were conducted when the same mouse's neural activity was  
1122 being compared across different conditions or different time windows. The significance level  
1123 was corrected for multiple comparisons using Holm–Sidak's tests unless otherwise indicated. All  
1124 error bars in the figures are s.e.m. In boxplots, the edges of the boxes are the 25th and 75th  
1125 percentiles (q1 and q3, respectively), and the whiskers extend to the most extreme data points not  
1126 considered outliers. Points are drawn as outliers if they are larger than  $q3+1.5\times(q3-q1)$  or  $q1-$   
1127  $1.5\times(q3-q1)$ . Individual data points were overlaid on boxplots to compare striatal areas.  
1128

1129 **Author Contributions:**

1130

1131 ITK and MWU designed experiments and collected and analyzed data. HM performed pilot experiments.

1132 The results were discussed and interpreted by ITK, NU and MWU. ITK, NU and MWU wrote the paper.

1133

1134

1135

1136 **Acknowledgments**

1137

1138 We thank Ju Tian, William Menegas, HyungGoo Kim and Takahiro Yamaguchi for technical assistance,

1139 Kristen Fang, Grace Chang, Melissa Yamada and Sakura Ikeda for assistance in animal training and

1140 histology, and all lab members for discussion. We also thank V. Jayaraman, R. Kerr, D. Kim, L. Looper,

1141 and K. Svoboda from the GENIE Project, Janelia Farm Research Campus, Howard Hughes Medical

1142 Institute for AAV-FLEX-GCaMP7f. This work was supported by National Institute of Mental Health

1143 R01MH095953, R01MH101207, R01MH110404, R01NS108740 (NU); and Japan Society for the

1144 Promotion of Science, Japan Science and Technology Agency (HM, ITK).

1145

1146

1147 **Declaration of Interests**

1148

1149 The authors declare no competing interests.

1150

1151

1152

## 1153 REFERENCE

- 1154 Adler, W.T., and Ma, W.J. (2018). Limitations of Proposed Signatures of Bayesian Confidence.  
1155 *Neural Comput.* *30*, 3327–3354.
- 1156 Bäckman, C.M., Malik, N., Zhang, Y., Shan, L., Grinberg, A., Hoffer, B.J., Westphal, H., and  
1157 Tomac, A.C. (2006). Characterization of a mouse strain expressing Cre recombinase from the 3'  
1158 untranslated region of the dopamine transporter locus. *Genes*. N. Y. N 2000 *44*, 383–390.
- 1159 Balleine, B.W., and Dickinson, A. (1998). Goal-directed instrumental action: contingency and  
1160 incentive learning and their cortical substrates. *Neuropharmacology* *37*, 407–419.
- 1161 Balleine, B.W., and O’Doherty, J.P. (2010). Human and Rodent Homologies in Action Control:  
1162 Corticostriatal Determinants of Goal-Directed and Habitual Action. *Neuropsychopharmacology*  
1163 *35*, 48–69.
- 1164 Bayer, H.M., and Glimcher, P.W. (2005). Midbrain dopamine neurons encode a quantitative  
1165 reward prediction error signal. *Neuron* *47*, 129–141.
- 1166 Brown, H.D., McCutcheon, J.E., Cone, J.J., Ragozzino, M.E., and Roitman, M.F. (2011). Primary  
1167 food reward and reward-predictive stimuli evoke different patterns of phasic dopamine  
1168 signaling throughout the striatum. *Eur. J. Neurosci.* *34*, 1997–2006.
- 1169 Chang, C.Y., Gardner, M.P.H., Conroy, J.C., Whitaker, L.R., and Schoenbaum, G. (2018). Brief,  
1170 But Not Prolonged, Pauses in the Firing of Midbrain Dopamine Neurons Are Sufficient to  
1171 Produce a Conditioned Inhibitor. *J. Neurosci.* *38*, 8822–8830.
- 1172 Chen, T.-W., Li, N., Daie, K., and Svoboda, K. (2017). A map of anticipatory activity in mouse  
1173 motor cortex. *Neuron* *94*, 866–879.
- 1174 Clark, J.J., Hollon, N.G., and Phillips, P.E. (2012). Pavlovian valuation systems in learning and  
1175 decision making. *Curr. Opin. Neurobiol.* *22*, 1054–1061.
- 1176 Cohen, J.Y., Haesler, S., Vong, L., Lowell, B.B., and Uchida, N. (2012). Neuron-type-specific  
1177 signals for reward and punishment in the ventral tegmental area. *Nature* *482*, 85–88.
- 1178 Cox, J., and Witten, I.B. (2019). Striatal circuits for reward learning and decision-making. *Nat.*  
1179 *Rev. Neurosci.* *20*, 482–494.
- 1180 Dabney, W., Kurth-Nelson, Z., Uchida, N., Starkweather, C.K., Hassabis, D., Munos, R., and  
1181 Botvinick, M. (2020). A distributional code for value in dopamine-based reinforcement learning.  
1182 *Nature* 1–5.
- 1183 Dana, H., Sun, Y., Mohar, B., Hulse, B.K., Kerlin, A.M., Hasseman, J.P., Tsegaye, G., Tsang, A.,  
1184 Wong, A., Patel, R., et al. (2019). High-performance calcium sensors for imaging activity in  
1185 neuronal populations and microcompartments. *Nat. Methods* *16*, 649–657.

- 1186 Daw, N.D., Niv, Y., and Dayan, P. (2005). Uncertainty-based competition between prefrontal  
1187 and dorsolateral striatal systems for behavioral control. *Nat. Neurosci.* *8*, 1704–1711.
- 1188 Dayan, P., and Berridge, K.C. (2014). Model-based and model-free Pavlovian reward learning:  
1189 Revaluation, revision, and revelation. *Cogn. Affect. Behav. Neurosci.* *14*, 473–492.
- 1190 Dezfouli, A., and Balleine, B.W. (2012). Habits, action sequences and reinforcement learning.  
1191 *Eur. J. Neurosci.* *35*, 1036–1051.
- 1192 Dickinson, A., and Weiskrantz, L. (1985). Actions and habits: the development of behavioural  
1193 autonomy. *Philos. Trans. R. Soc. Lond. B Biol. Sci.* *308*, 67–78.
- 1194 Dolan, R.J., and Dayan, P. (2013). Goals and Habits in the Brain. *Neuron* *80*, 312–325.
- 1195 Engelhard, B., Finkelstein, J., Cox, J., Fleming, W., Jang, H.J., Ornelas, S., Koay, S.A., Thiberge,  
1196 S.Y., Daw, N.D., Tank, D.W., et al. (2019). Specialized coding of sensory, motor and cognitive  
1197 variables in VTA dopamine neurons. *Nature* *570*, 509–513.
- 1198 Eshel, N., Tian, J., Bukwich, M., and Uchida, N. (2016). Dopamine neurons share common  
1199 response function for reward prediction error. *Nat. Neurosci.* *19*, 479–486.
- 1200 Evans, R.C., Zhu, M., and Khaliq, Z.M. (2017). Dopamine inhibition differentially controls  
1201 excitability of substantia nigra dopamine neuron subpopulations through T-type calcium  
1202 channels. *J. Neurosci.* *37*, 3704–3720.
- 1203 Farassat, N., Costa, K.M., Stojanovic, S., Albert, S., Kovacheva, L., Shin, J., Egger, R., Somayaji,  
1204 M., Duvarci, S., and Schneider, G. (2019). In vivo functional diversity of midbrain dopamine  
1205 neurons within identified axonal projections. *Elife* *8*.
- 1206 Gerfen, C.R., and Surmeier, D.J. (2011). Modulation of Striatal Projection Systems by Dopamine.  
1207 *Annu. Rev. Neurosci.* *34*, 441–466.
- 1208 Graybiel, A.M. (2008). Habits, Rituals, and the Evaluative Brain. *Annu. Rev. Neurosci.* *31*, 359–  
1209 387.
- 1210 Green, D.M., and Swets, J.A. (1966). *Signal detection theory and psychophysics* (Wiley New  
1211 York).
- 1212 Hangya, B., Sanders, J.I., and Kepecs, A. (2016). A Mathematical Framework for Statistical  
1213 Decision Confidence. *Neural Comput.* *28*, 1840–1858.
- 1214 Hart, A.S., Rutledge, R.B., Glimcher, P.W., and Phillips, P.E. (2014). Phasic dopamine release in  
1215 the rat nucleus accumbens symmetrically encodes a reward prediction error term. *J. Neurosci.*  
1216 *34*, 698–704.

- 1217 Herrnstein, R.J. (1961). Relative and absolute strength of responses as a function of frequency  
1218 of reinforcement.
- 1219 Hikosaka, O., Rand, M.K., Miyachi, S., and Miyashita, K. (1995). Learning of sequential  
1220 movements in the monkey: process of learning and retention of memory. *J. Neurophysiol.* *74*,  
1221 1652–1661.
- 1222 Hirokawa, J., Vaughan, A., Masset, P., Ott, T., and Kepecs, A. (2019). Frontal cortex neuron types  
1223 categorically encode single decision variables. *Nature* *576*, 446–451.
- 1224 Hong, S., Jhou, T.C., Smith, M., Saleem, K.S., and Hikosaka, O. (2011). Negative reward signals  
1225 from the lateral habenula to dopamine neurons are mediated by rostromedial tegmental  
1226 nucleus in primates. *J. Neurosci.* *31*, 11457–11471.
- 1227 Howe, M.W., and Dombeck, D.A. (2016). Rapid signalling in distinct dopaminergic axons during  
1228 locomotion and reward. *Nature* *535*, 505–510.
- 1229 Hunnicutt, B.J., Jongbloets, B.C., Birdsong, W.T., Gertz, K.J., Zhong, H., and Mao, T. (2016). A  
1230 comprehensive excitatory input map of the striatum reveals novel functional organization. *ELife*  
1231 *5*.
- 1232 Ilango, A., Kesner, A.J., Keller, K.L., Stuber, G.D., Bonci, A., and Ikemoto, S. (2014). Similar Roles  
1233 of Substantia Nigra and Ventral Tegmental Dopamine Neurons in Reward and Aversion. *J.*  
1234 *Neurosci.* *34*, 817–822.
- 1235 Jhou, T.C., Geisler, S., Marinelli, M., Degarmo, B.A., and Zahm, D.S. (2009a). The mesopontine  
1236 rostromedial tegmental nucleus: a structure targeted by the lateral habenula that projects to  
1237 the ventral tegmental area of Tsai and substantia nigra compacta. *J. Comp. Neurol.* *513*, 566–  
1238 596.
- 1239 Jhou, T.C., Fields, H.L., Baxter, M.G., Saper, C.B., and Holland, P.C. (2009b). The rostromedial  
1240 tegmental nucleus (RMTg), a GABAergic afferent to midbrain dopamine neurons, encodes  
1241 aversive stimuli and inhibits motor responses. *Neuron* *61*, 786–800.
- 1242 de Jong, J.W., Afjei, S.A., Pollak Dorocic, I., Peck, J.R., Liu, C., Kim, C.K., Tian, L., Deisseroth, K.,  
1243 and Lammel, S. (2019). A Neural Circuit Mechanism for Encoding Aversive Stimuli in the  
1244 Mesolimbic Dopamine System. *Neuron* *101*, 133-151.e7.
- 1245 Kamin, L.J. (1969). Predictability, surprise, attention and conditioning. *Punishm. Aversive Behav.*
- 1246 Keiflin, R., Pribut, H.J., Shah, N.B., and Janak, P.H. (2019). Ventral Tegmental Dopamine Neurons  
1247 Participate in Reward Identity Predictions. *Curr. Biol.* *29*, 93-103.e3.
- 1248 Kepecs, A., Uchida, N., Zariwala, H.A., and Mainen, Z.F. (2008). Neural correlates, computation  
1249 and behavioural impact of decision confidence. *Nature* *455*, 227–231.

- 1250 Kim, H.F., Ghazizadeh, A., and Hikosaka, O. (2015). Dopamine Neurons Encoding Long-Term  
1251 Memory of Object Value for Habitual Behavior. *Cell* *163*, 1165–1175.
- 1252 Kudo, Y., Akita, K., Nakamura, T., Ogura, A., Makino, T., Tamagawa, A., Ozaki, K., and Miyakawa,  
1253 A. (1992). A single optical fiber fluorometric device for measurement of intracellular Ca<sup>2+</sup>  
1254 concentration: its application to hippocampal neurons in vitro and in vivo. *Neuroscience* *50*,  
1255 619–625.
- 1256 Lak, A., Nomoto, K., Keramati, M., Sakagami, M., and Kepecs, A. (2017). Midbrain dopamine  
1257 neurons signal belief in choice accuracy during a perceptual decision. *Curr. Biol.* *27*, 821–832.
- 1258 Lak, A., Hueske, E., Hirokawa, J., Masset, P., Ott, T., Urai, A.E., Donner, T.H., Carandini, M.,  
1259 Tonegawa, S., Uchida, N., et al. (2020a). Reinforcement biases subsequent perceptual decisions  
1260 when confidence is low, a widespread behavioral phenomenon. *ELife* *9*, e49834.
- 1261 Lak, A., Okun, M., Moss, M.M., Gurnani, H., Farrell, K., Wells, M.J., Reddy, C.B., Kepecs, A.,  
1262 Harris, K.D., and Carandini, M. (2020b). Dopaminergic and prefrontal basis of learning from  
1263 sensory confidence and reward value. *Neuron* *105*, 700–711.
- 1264 Lammel, S., Hetzel, A., Häckel, O., Jones, I., Liss, B., and Roeper, J. (2008). Unique Properties of  
1265 Mesoprefrontal Neurons within a Dual Mesocorticolimbic Dopamine System. *Neuron* *57*, 760–  
1266 773.
- 1267 Lee, K., Claar, L.D., Hachisuka, A., Bakhurin, K.I., Nguyen, J., Trott, J.M., Gill, J.L., and  
1268 Masmanidis, S.C. (2020). Temporally restricted dopaminergic control of reward-conditioned  
1269 movements. *Nat. Neurosci.* *23*, 209–216.
- 1270 Lerner, T.N., Shilyansky, C., Davidson, T.J., Evans, K.E., Beier, K.T., Zalocusky, K.A., Crow, A.K.,  
1271 Malenka, R.C., Luo, L., Tomer, R., et al. (2015). Intact-Brain Analyses Reveal Distinct Information  
1272 Carried by SNc Dopamine Subcircuits. *Cell* *162*, 635–647.
- 1273 Li, H., Vento, P.J., Parrilla-Carrero, J., Pullmann, D., Chao, Y.S., Eid, M., and Jhou, T.C. (2019).  
1274 Three Rostromedial Tegmental Afferents Drive Triply Dissociable Aspects of Punishment  
1275 Learning and Aversive Valence Encoding. *Neuron* *104*, 987-999.e4.
- 1276 Lloyd, K., and Dayan, P. (2016). Safety out of control: dopamine and defence. *Behav. Brain*  
1277 *Funct.* *BBF* *12*, 15.
- 1278 Madisen, L., Zwingman, T.A., Sunkin, S.M., Oh, S.W., Zariwala, H.A., Gu, H., Ng, L.L., Palmiter,  
1279 R.D., Hawrylycz, M.J., Jones, A.R., et al. (2010). A robust and high-throughput Cre reporting and  
1280 characterization system for the whole mouse brain. *Nat. Neurosci.* *13*, 133–140.
- 1281 Malvaez, M., and Wassum, K.M. (2018). Regulation of habit formation in the dorsal striatum.  
1282 *Curr. Opin. Behav. Sci.* *20*, 67–74.



- 1283 Matsumoto, M., and Hikosaka, O. (2007). Lateral habenula as a source of negative reward  
1284 signals in dopamine neurons. *Nature* *447*, 1111–1115.
- 1285 Matsumoto, M., and Hikosaka, O. (2009). Two types of dopamine neuron distinctly convey  
1286 positive and negative motivational signals. *Nature* *459*, 837–841.
- 1287 Matsuzaka, Y., Picard, N., and Strick, P.L. (2007). Skill Representation in the Primary Motor  
1288 Cortex After Long-Term Practice. *J. Neurophysiol.* *97*, 1819–1832.
- 1289 Menegas, W., Bergan, J.F., Ogawa, S.K., Isogai, Y., Umadevi Venkataraju, K., Osten, P., Uchida,  
1290 N., and Watabe-Uchida, M. (2015). Dopamine neurons projecting to the posterior striatum  
1291 form an anatomically distinct subclass. *ELife* *4*, e10032.
- 1292 Menegas, W., Babayan, B.M., Uchida, N., and Watabe-Uchida, M. (2017). Opposite initialization  
1293 to novel cues in dopamine signaling in ventral and posterior striatum in mice. *ELife* *6*.
- 1294 Menegas, W., Akiti, K., Amo, R., Uchida, N., and Watabe-Uchida, M. (2018). Dopamine neurons  
1295 projecting to the posterior striatum reinforce avoidance of threatening stimuli. *Nat. Neurosci.*  
1296 *21*, 1421–1430.
- 1297 Miller, K.J., Shenhav, A., and Ludvig, E.A. (2019). Habits without values. *Psychol. Rev.* *126*, 292–  
1298 311.
- 1299 Montague, P.R., Dayan, P., and Sejnowski, T.J. (1996). A framework for mesencephalic  
1300 dopamine systems based on predictive Hebbian learning. *J. Neurosci.* *16*, 1936–1947.
- 1301 Morris, A., and Cushman, F. (2019). Model-Free RL or Action Sequences? *Front. Psychol.* *10*.
- 1302 O’Doherty, J., Dayan, P., Schultz, J., Deichmann, R., Friston, K., and Dolan, R.J. (2004).  
1303 Dissociable Roles of Ventral and Dorsal Striatum in Instrumental Conditioning. *Science* *304*,  
1304 452–454.
- 1305 Ölveczky, B.P. (2011). Motoring ahead with rodents. *Curr. Opin. Neurobiol.* *21*, 571–578.
- 1306 Oyama, K., Hernádi, I., Iijima, T., and Tsutsui, K.-I. (2010). Reward Prediction Error Coding in  
1307 Dorsal Striatal Neurons. *J. Neurosci.* *30*, 11447–11457.
- 1308 Park, I.M., Meister, M.L.R., Huk, A.C., and Pillow, J.W. (2014). Encoding and decoding in parietal  
1309 cortex during sensorimotor decision-making. *Nat. Neurosci.* *17*, 1395–1403.
- 1310 Parker, N.F., Cameron, C.M., Taliaferro, J.P., Lee, J., Choi, J.Y., Davidson, T.J., Daw, N.D., and  
1311 Witten, I.B. (2016). Reward and choice encoding in terminals of midbrain dopamine neurons  
1312 depends on striatal target. *Nat. Neurosci.* *19*, 845–854.
- 1313 Paxinos, G., and Franklin, K.B.J. (2019). Paxinos and Franklin’s the Mouse Brain in Stereotaxic  
1314 Coordinates (Academic Press).

- 1315 Pearce, J.M., and Hall, G. (1980). A model for Pavlovian learning: variations in the effectiveness  
1316 of conditioned but not of unconditioned stimuli. *Psychol. Rev.* *87*, 532.
- 1317 Rangel, A., Camerer, C., and Montague, P.R. (2008). A framework for studying the neurobiology  
1318 of value-based decision making. *Nat. Rev. Neurosci.* *9*, 545–556.
- 1319 Rausch, M., and Zehetleitner, M. (2019). The folded X-pattern is not necessarily a statistical  
1320 signature of decision confidence. *PLOS Comput. Biol.* *15*, e1007456.
- 1321 Rescorla, R.A., and Wagner, A.R. (1972). A theory of Pavlovian conditioning: Variations in the  
1322 effectiveness of reinforcement and nonreinforcement. *Class. Cond. II Curr. Res. Theory* *2*, 64–  
1323 99.
- 1324 Robbins, T.W., and Costa, R.M. (2017). Habits. *Curr. Biol.* *27*, R1200–R1206.
- 1325 Rorie, A.E., Gao, J., McClelland, J.L., and Newsome, W.T. (2010). Integration of Sensory and  
1326 Reward Information during Perceptual Decision-Making in Lateral Intraparietal Cortex (LIP) of  
1327 the Macaque Monkey. *PLOS ONE* *5*, e9308.
- 1328 Sajad, A., Godlove, D.C., and Schall, J.D. (2019). Cortical microcircuitry of performance  
1329 monitoring. *Nat. Neurosci.* *22*, 265–274.
- 1330 Samejima, K., and Doya, K. (2007). Multiple Representations of Belief States and Action Values  
1331 in Corticobasal Ganglia Loops. *Ann. N. Y. Acad. Sci.* *1104*, 213–228.
- 1332 Saunders, B.T., Richard, J.M., Margolis, E.B., and Janak, P.H. (2018). Dopamine neurons create  
1333 Pavlovian conditioned stimuli with circuit-defined motivational properties. *Nat. Neurosci.* *21*,  
1334 1072–1083.
- 1335 Schultz, W., Dayan, P., and Montague, P.R. (1997). A neural substrate of prediction and reward.  
1336 *Science* *275*, 1593–1599.
- 1337 da Silva, J.A., Tecuapetla, F., Paixão, V., and Costa, R.M. (2018). Dopamine neuron activity  
1338 before action initiation gates and invigorates future movements. *Nature* *554*, 244–248.
- 1339 Smith, K.S., and Graybiel, A.M. (2016). Habit formation. *Dialogues Clin. Neurosci.* *18*, 33–43.
- 1340 Stuphorn, V., Taylor, T.L., and Schall, J.D. (2000). Performance monitoring by the supplementary  
1341 eye field. *Nature* *408*, 857–860.
- 1342 Suri, R.E., and Schultz, W. (1999). A neural network model with dopamine-like reinforcement  
1343 signal that learns a spatial delayed response task. *Neuroscience* *91*, 871–890.
- 1344 Sutton, R.S. (1988). Learning to predict by the methods of temporal differences. *Mach. Learn.* *3*,  
1345 9–44.

- 1346 Sutton, R.S., and Barto, A.G. (1987). A temporal-difference model of classical conditioning. In  
1347 Proceedings of the Ninth Annual Conference of the Cognitive Science Society, (Seattle, WA), pp.  
1348 355–378.
- 1349 Sutton, R.S., and Barto, A.G. (2011). Reinforcement learning: An introduction.
- 1350 Sutton, R.S., and Barto, A.G. (2018). Reinforcement Learning, second edition: An Introduction  
1351 (MIT Press).
- 1352 Thorndike, E.L. (1932). The fundamentals of learning (New York, NY, US: Teachers College  
1353 Bureau of Publications).
- 1354 Tian, J., Huang, R., Cohen, J.Y., Osakada, F., Kobak, D., Machens, C.K., Callaway, E.M., Uchida, N.,  
1355 and Watabe-Uchida, M. (2016). Distributed and Mixed Information in Monosynaptic Inputs to  
1356 Dopamine Neurons. *Neuron* 91, 1374–1389.
- 1357 Uchida, N., and Mainen, Z.F. (2003). Speed and accuracy of olfactory discrimination in the rat.  
1358 *Nat. Neurosci.* 6, 1224–1229.
- 1359 Wang, A.Y., Miura, K., and Uchida, N. (2013). The dorsomedial striatum encodes net expected  
1360 return, critical for energizing performance vigor. *Nat. Neurosci.* 16, 639–647.
- 1361 Watabe-Uchida, M., and Uchida, N. (2018). Multiple dopamine systems: Weal and woe of  
1362 dopamine. In *Cold Spring Harbor Symposia on Quantitative Biology*, (Cold Spring Harbor  
1363 Laboratory Press), pp. 83–95.
- 1364 Yetnikoff, L., Lavezzi, H.N., Reichard, R.A., and Zahm, D.S. (2014). An update on the connections  
1365 of the ventral mesencephalic dopaminergic complex. *Neuroscience* 282, 23–48.
- 1366 Yin, H.H., Knowlton, B.J., and Balleine, B.W. (2004). Lesions of dorsolateral striatum preserve  
1367 outcome expectancy but disrupt habit formation in instrumental learning. *Eur. J. Neurosci.* 19,  
1368 181–189.
- 1369 Yin, H.H., Ostlund, S.B., Knowlton, B.J., and Balleine, B.W. (2005). The role of the dorsomedial  
1370 striatum in instrumental conditioning. *Eur. J. Neurosci.* 22, 513–523.
- 1371
- 1372
- 1373
- 1374
- 1375

**Figure 1**

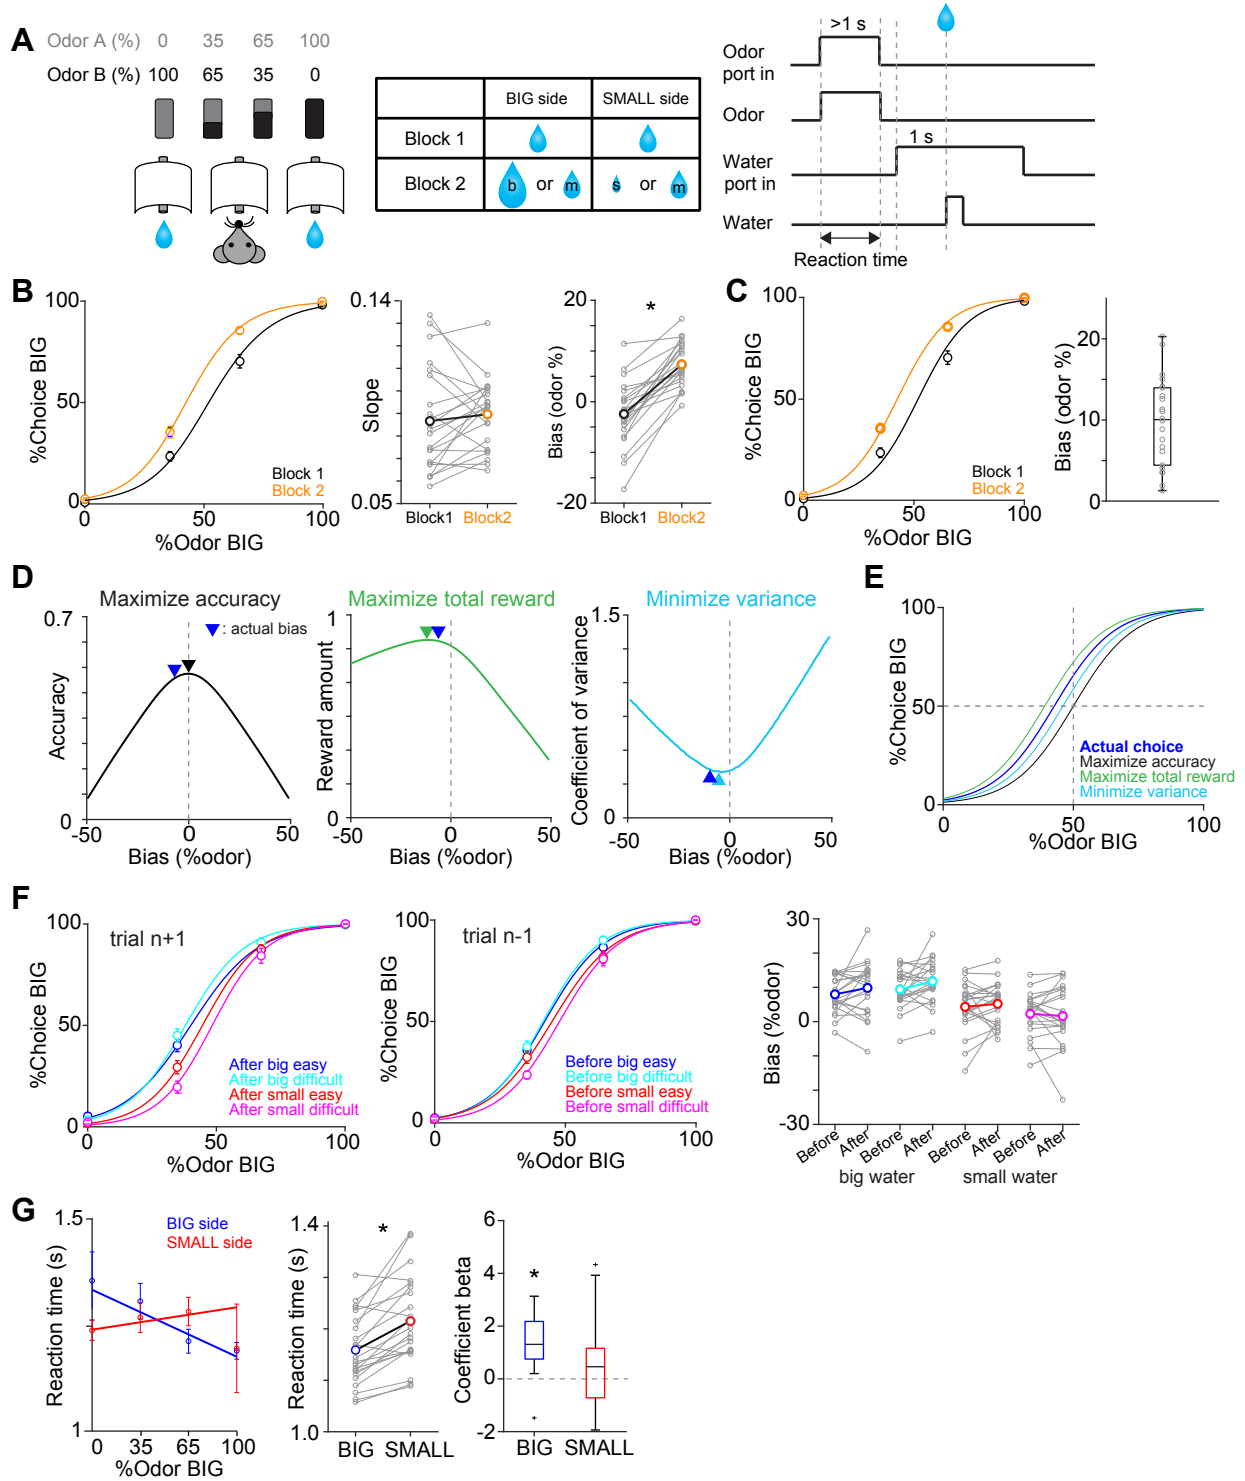

**Figure 1. Perceptual choice paradigm with probabilistic reward conditions** (A) A mouse discriminated a dominant odor in odor mixtures that indicates water availability in either the left or right water port. Correct choice was rewarded by a drop of water. In each session, an equal amount of water was assigned at both water ports in the first block, and in the second block, big/medium water (50% 50%, randomized) was assigned at one water port (BIG side) and medium/small water (50% 50%, randomized) was assigned at another port (SMALL side). The BIG or SMALL side was assigned to a left or right water port in a pseudorandom order across sessions. (B) Left, % of choice of the BIG side in block 1 and 2 (mean  $\pm$  SEM) and the average psychometric curve for each block. Center, slope of the psychometric curve. Right, choice bias at 50/50 choice, expressed as 50 - odor (%). (C) Left, % of choice of the BIG side in block 1 and 2 (mean  $\pm$  SEM) and the average psychometric curve with a fixed slope across blocks. Right, all the animals showed choice bias toward BIG side in block 2 compared to block 1. The choice bias was expressed by a lateral shift of a psychometric curve with a fixed slope across blocks. (D) Average reward amounts, accuracy, and coefficients of variance were examined with different levels of choice bias with a fixed slope (average slope of all animals). (E) Optimal choice patterns with different strategies in D (bias -11, 0, and -4, respectively) and the actual average choice pattern (mean bias -7.3). (F) Trial-by-trial choice updating was examined by comparing choice bias before (center, trial n-1) and after (left, trial n+1) specific trial types. Choice updating in one trial was not significant for reward acquisition of either small or big water in easy or difficult trials (right). (G) Left, animal's reaction time was modulated by odor types. Center, for easy trials (pure odors, correct choice), reaction time was shorter when animals chose the BIG side ( $p=2.7\times 10^{-5}$ ). Right, the reaction time was negatively correlated with sensory evidence for choice of the BIG side ( $p=1.2\times 10^{-4}$ ), whereas the modulation was not significant for choice of the SMALL side ( $p=0.13$ ).  $n = 22$  animals.

**Figure 2**

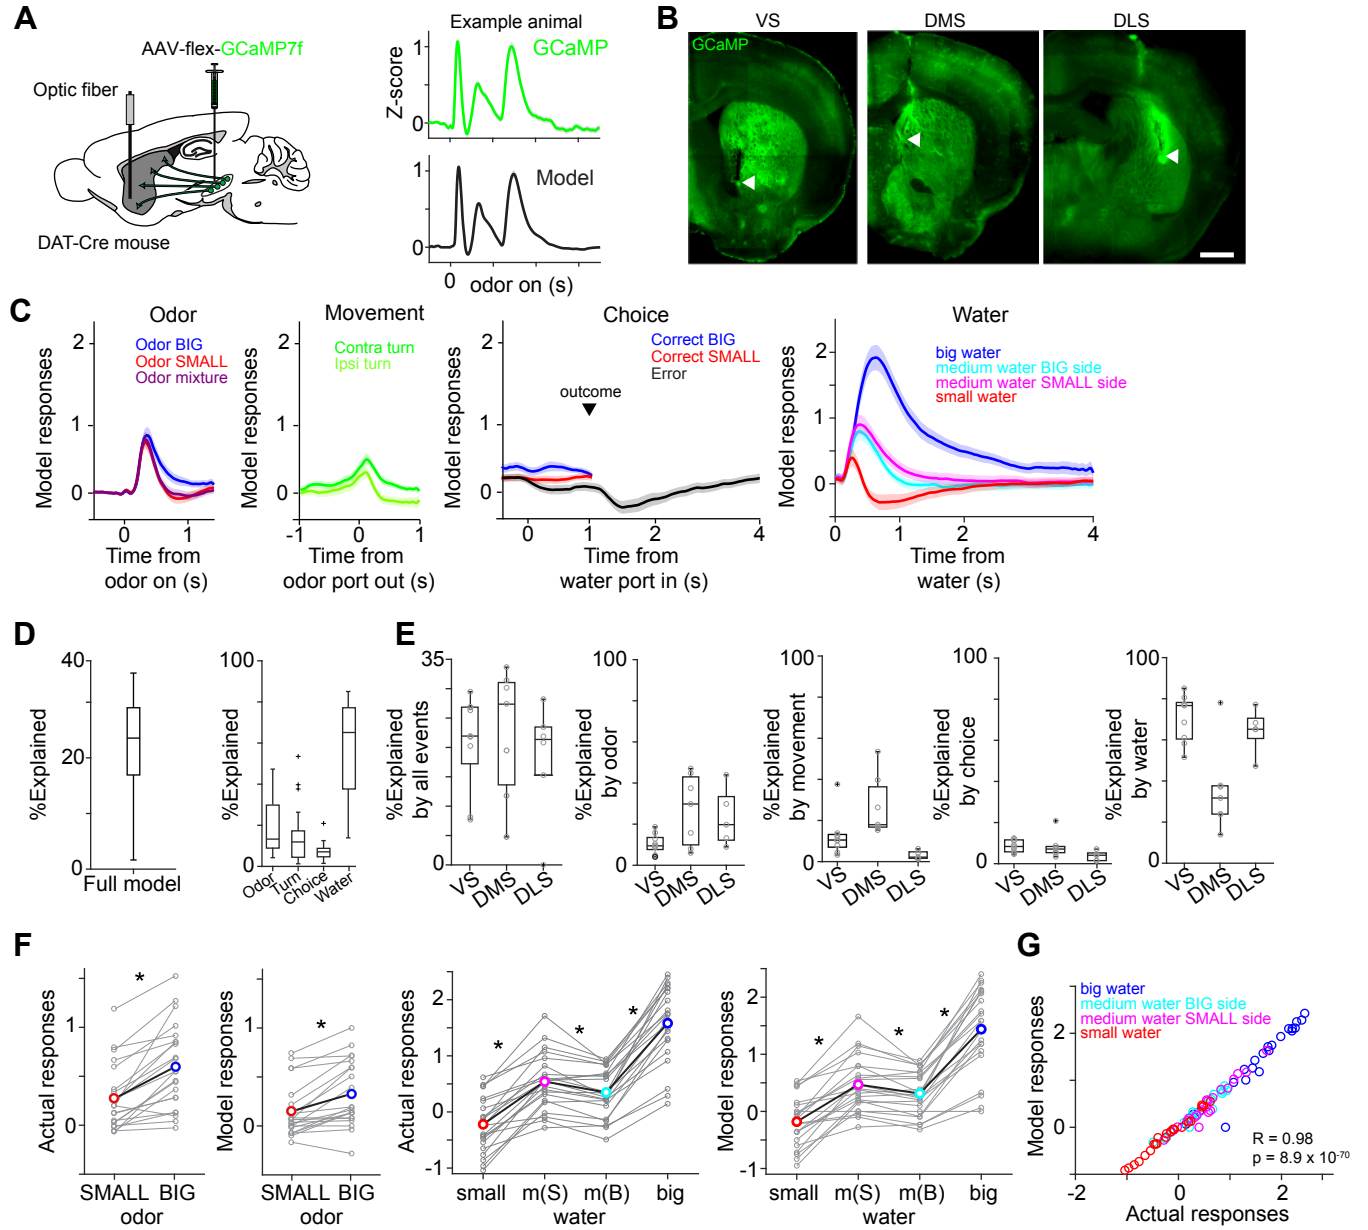

**Figure 2. Dopamine axons in the striatum show characteristics of RPE** (A) AAV-flex-GCaMP7f was injected in VTA and SNc, and dopamine axon activity was measured with an optic fiber inserted in the striatum. Right top, dopamine axon activity in all the valid trials (an animal chose an either water port after wait for the required stay time) in an example animal, aligned at odor onset (mean  $\pm$  SEM). Right bottom, a fitted model of the same animal (mean  $\pm$  SEM). (B) Location of an optic fiber in example animals. Arrow heads, tips of fibers. Green, GCaMP7f. Bar = 1 mm (C) Odor-, movement-, choice-, and water-locked components in the model of all the animals (mean  $\pm$  SEM). (D) Contribution of each component in the model was measured by reduction of deviance in the full model compared to a reduced model excluding the component. (E) Contribution of each component in the model in each animal group. (F) Left, comparison of dopamine axon responses to an odor cue that instructs to choose BIG and SMALL side in easy trials (pure odor, correct choice, -1-0 s before odor port out).  $p=5.0\times 10^{-6}$  for actual signals and  $p=7.4\times 10^{-5}$  for models. Right, comparison of dopamine axon responses to different sizes of water (big versus medium water with BIG expectation, and medium versus small water with SMALL expectation) and to medium water with different expectation (BIG versus SMALL expectation) (0.3-1.3 s after water onset).  $p=1.2\times 10^{-11}$ ,  $p=3.8\times 10^{-9}$  and  $p=3.9\times 10^{-4}$ , respectively for actual signals, and  $p=1.0\times 10^{-9}$ ,  $p=1.0\times 10^{-7}$ , and  $p=0.0031$ , respectively for models.  $n=22$  animals. m(B), medium water with BIG expectation; m(S), medium water with SMALL expectation. (G) Comparison between actual dopamine axon responses and model responses to water.



**Figure 3**

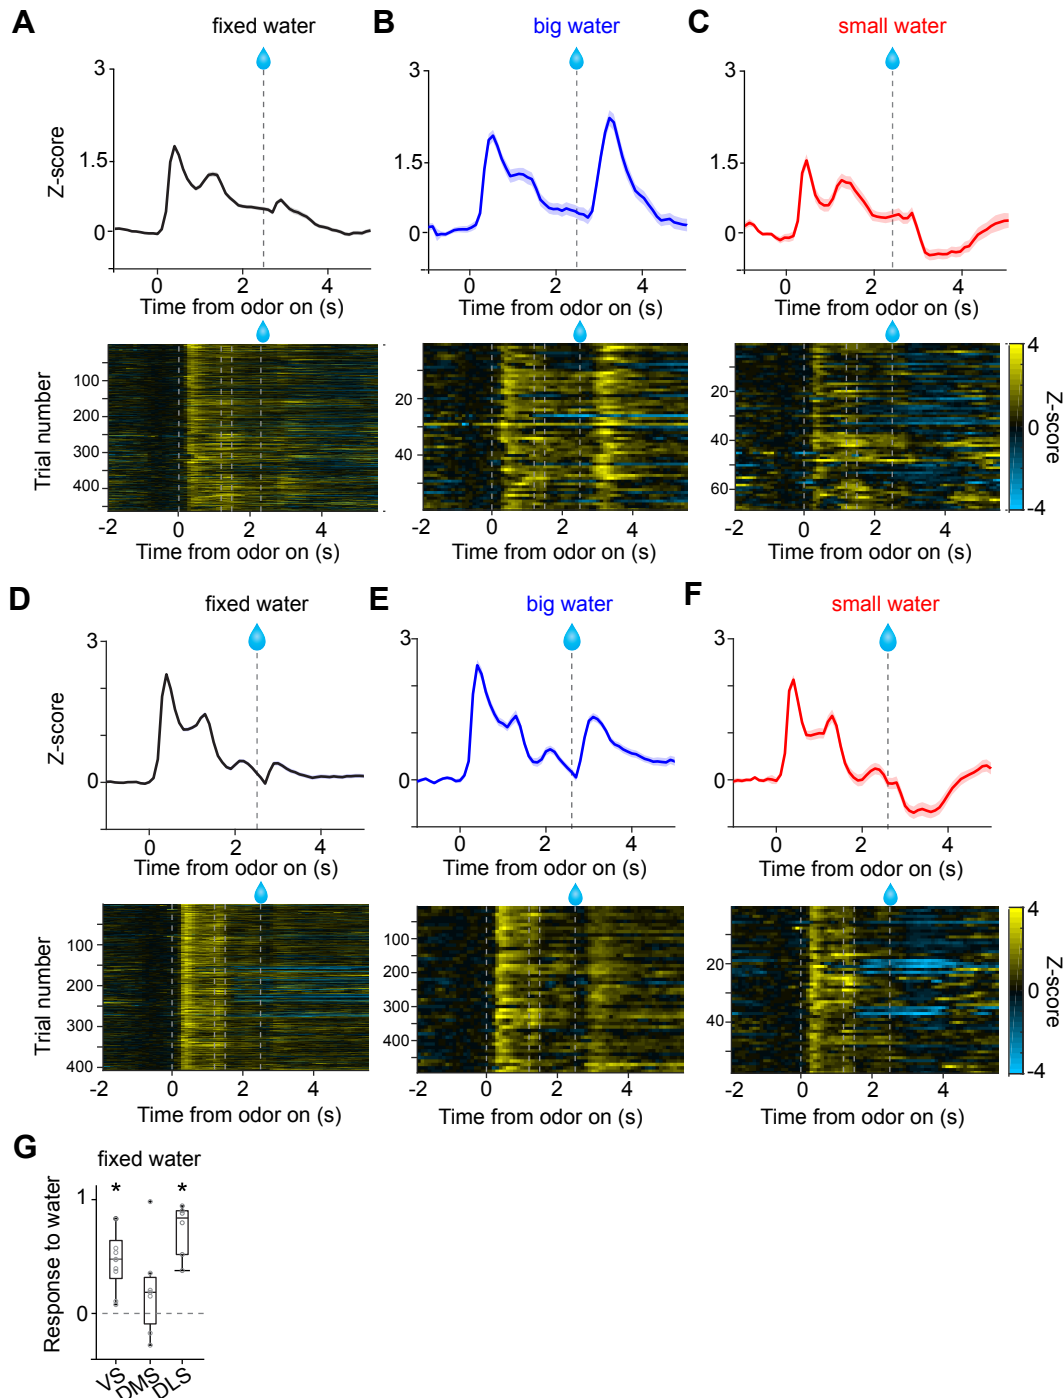

**Figure 3. Small responses to fixed amounts of water in dopamine axons in DMS**  
 (A, D) Dopamine axon responses to water in a fixed reward amount task (pure odor, correct choice). (B, E) Dopamine axon responses to a big amount of water in a variable reward amount task (pure odor, correct choice). (C, F) Dopamine axon responses to a small amount of water in a variable reward amount task (pure odor, correct choice). A-C, dopamine axon activity in an example animal; D-F, another example animal. (G) Responses to water (0.3-1.3 s after water onset) were significantly modulated with striatal location ( $p=0.020$ , ANOVA). The water responses were significantly positive in VS ( $p=0.0011$ ) and in DLS ( $p=6.3 \times 10^{-4}$ ), but not in DMS ( $p=0.28$ ).

**Figure 4**

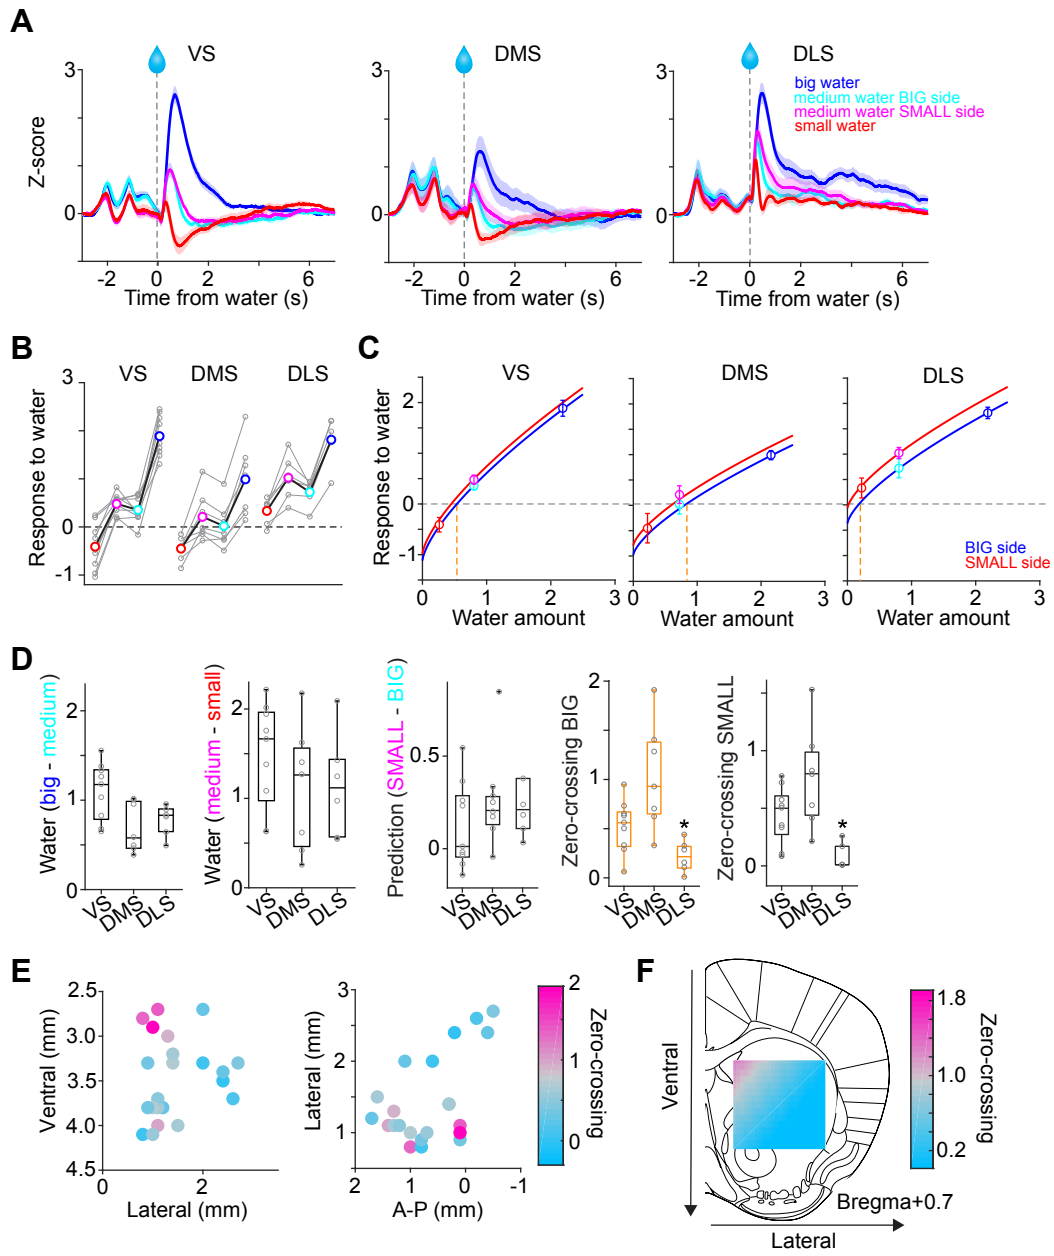

**Figure 4. Responses to water in dopamine axons in the striatum** (A) Activity patterns per different striatal location, aligned at water onset (mean  $\pm$  SEM, n=9 for VS, n=7 for DMS, n=6 for DLS). (B) Average responses to each water condition in each animal grouped by striatal areas. (C) Average response functions of dopamine axons in each striatal area. (D) Comparison of parameters for each animal grouped by striatal areas. "Water big-medium" is responses to big water minus responses to medium water at the BIG side and "Water medium-small" is responses to medium water minus responses to small water at the SMALL side, normalized with difference of water amounts (2.2 minus 0.8 for BIG and 0.8 minus 0.2 for SMALL). "Prediction SMALL-BIG" is responses to medium water at SMALL side minus responses to medium water at BIG side. "Zero-crossing BIG" is the water amount when the dopamine response is zero at BIG and side, which was estimated by the obtained response function. "Zero-crossing SMALL" is the water amount when the dopamine response is zero at SMALL side, which was estimated by the obtained response function. Response changes by water amounts (BIG or SMALL) or prediction was not significantly modulated by the striatal areas (p=0.011, p=0.34, p=0.23, ANOVA), whereas zero-crossing points (BIG or SMALL) were significantly modulated (p=0.002, p=0.002, ANOVA; p=0.004, DMS versus DLS for BIG side; p=0.005, VS versus DLS; p=0.003, DMS versus DLS for SMALL side). (E) Zero-crossing points were plotted along anatomical location in the striatum. Zero-crossing points were correlated with medial-lateral positions (p=0.011) and with dorsal-ventral positions (p=0.014). (F) Zero-crossing points were fitted with recorded location, and the estimated values in the striatal area were overlaid on the atlas for visualization (see Methods).

**Figure 5**

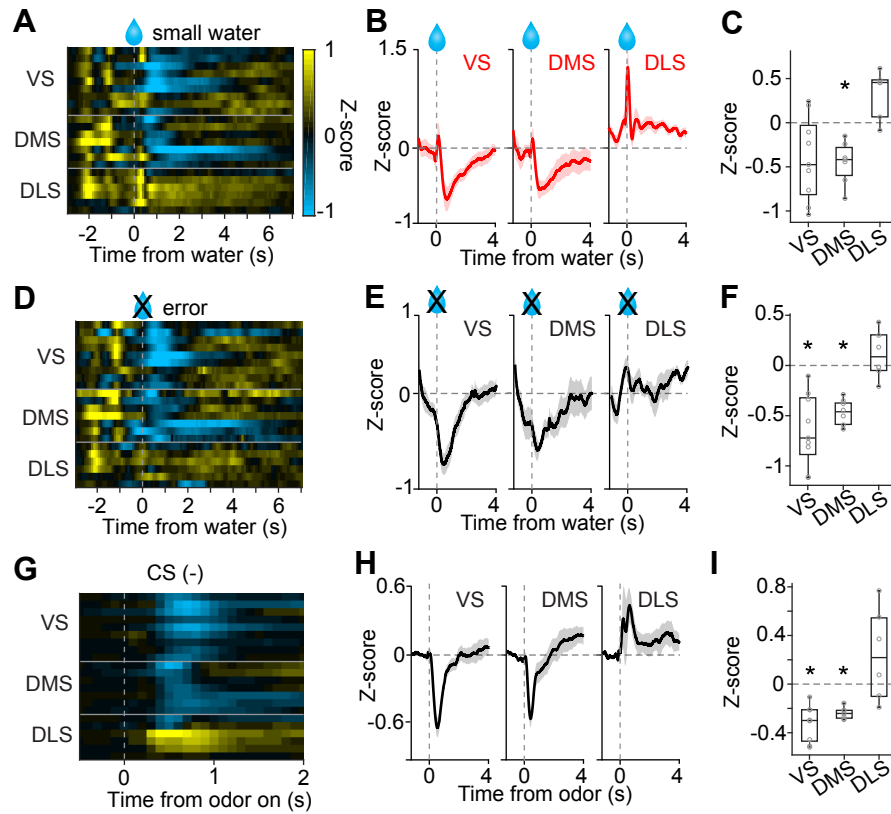

**Figure 5. No inhibition by negative prediction error in dopamine axons in DLS** (A) Activity pattern in each recording site aligned at small water. (B) Average activity pattern in each brain area (mean  $\pm$  SEM). (C) Mean responses to small water (0.3-1.3 s after water onset) were negative in VS and DMS ( $p=0.031$ ,  $p=0.0025$ , responses versus baseline), but not in DLS. The responses were different across striatal areas ( $p=0.0013$ , ANOVA;  $p=0.0042$ , VS versus DLS;  $p=2.8 \times 10^{-4}$ , DMS versus DLS). (D) Activity pattern aligned at water timing in error trials. (E) Average activity pattern in each brain areas (mean  $\pm$  SEM). (F) Mean responses in error trials (0.3-1.3 s after water timing) were negative in VS and DMS ( $p=6.2 \times 10^{-4}$ ,  $p=6.5 \times 10^{-5}$ , responses versus baseline), but not in DLS. The responses were different across striatal areas ( $p=1.5 \times 10^{-4}$ , ANOVA;  $p=5.8 \times 10^{-4}$ , VS versus DLS;  $p=1.6 \times 10^{-4}$ , DMS versus DLS). (G) Activity pattern aligned at CS(-) in a fixed reward amount task. (H) Average activity pattern in each brain area (mean  $\pm$  SEM). (I) Mean responses at CS(-) (-1-0 s before odor port out) were negative in VS and DMS ( $p=1.4 \times 10^{-4}$ , VS;  $p=1.0 \times 10^{-5}$ , DMS, responses versus baseline), but not in DLS. Responses were different across striatal areas ( $p=2.5 \times 10^{-4}$ , ANOVA;  $p=0.0012$ , VS versus DLS;  $p=0.0065$ , DMS versus DLS).

**Figure 6**

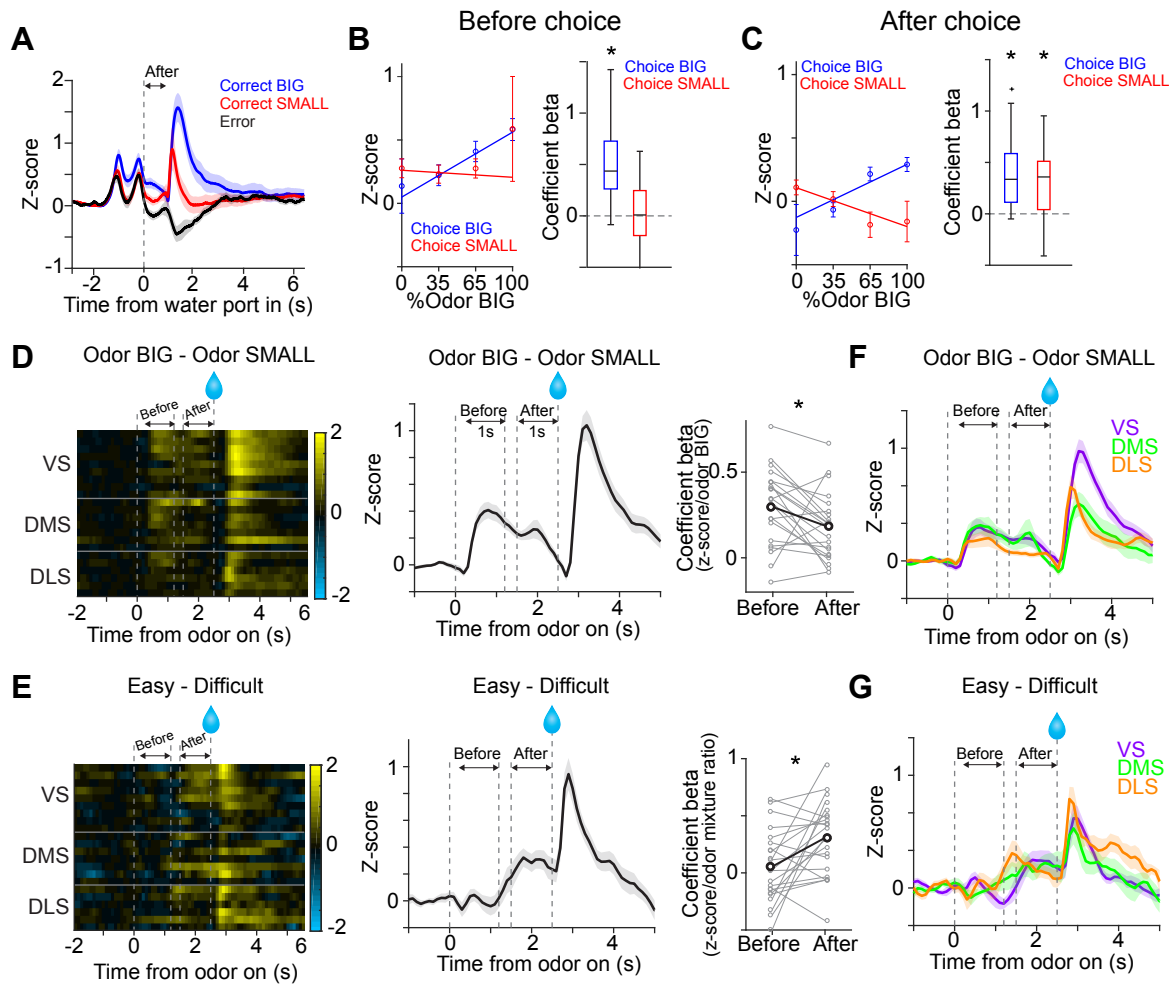

**Figure 6. Dopamine signals stimulus-associated value and sensory evidence with different**

**dynamics** (A) Dopamine axon activity pattern aligned to time of water port entry for all animals (mean  $\pm$  SEM). (B) Responses before choice (-1-0 s before odor port out) were fitted with linear regression with odor mixture ratio, and coefficient beta (slope) for all the animals are plotted. Correlation slopes were significantly positive for choice of the BIG side ( $p=5.6\times 10^{-6}$ ), but not significant for choice of the SMALL side ( $p=0.42$ ). (C) Responses after choice (0-1 s after water port in) were fitted with linear regression with stimulus evidence (odor %) and coefficient beta (slope) for all the animals are plotted. Correlation slopes were significantly positive for both choice of the BIG side ( $p=1.4\times 10^{-5}$ ) and of the SMALL side ( $p=2.2\times 10^{-4}$ ). (D) Dopamine axon activity with an odor that instructed to choose BIG side (pure odor, correct choice) minus activity with odor that instructed to choose SMALL side (pure odor, correct choice) in each recording site (left), and the average difference in activity was plotted (mean  $\pm$  SEM, middle). Correlation slopes between responses and stimulus-associated value (water amounts) significantly decreased after choice ( $p=0.025$ , before choice (-1-0 s before odor port out) versus after choice (0-1 s after water port in), pure odor, correct choice). (E) Dopamine axon activity when an animal chose SMALL side in easy trials (pure odor, correct choice) minus activity in difficult trials (mixture odor, wrong choice) in each recording site (left), and the average difference in activity was plotted (mean  $\pm$  SEM, center). Coefficient beta between responses to odors and sensory evidence (odor %) significantly increased after choice ( $p=0.0078$ , before choice versus after choice). (F) Average difference in activity (odor BIG minus odor SMALL) before and after choice in each striatal area. The difference of coefficient (before versus after choice) was not significantly different across areas ( $p=0.86$ , ANOVA). (G) Average difference in activity (easy minus difficult) in each striatal area. The difference of coefficient (before versus after choice) was not significantly different across areas ( $p=0.25$ , ANOVA).



**A**

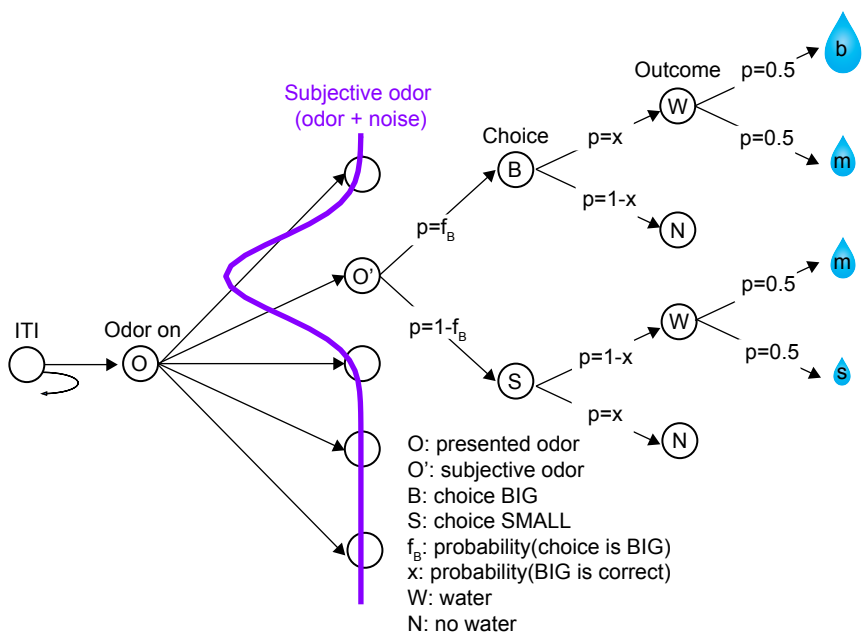

**B**

Adding perceptual noise

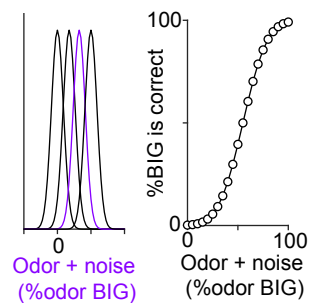

**C**

Deterministic choice

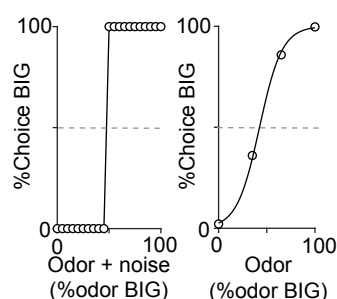

**D**

Softmax strategy

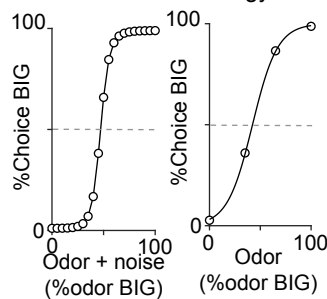

**E**

Actual data

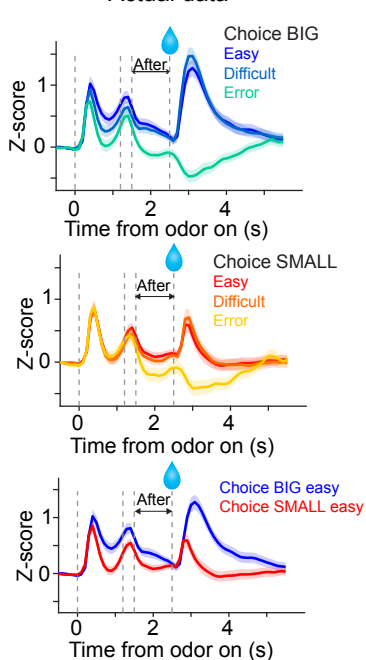

**F**

Deterministic choice

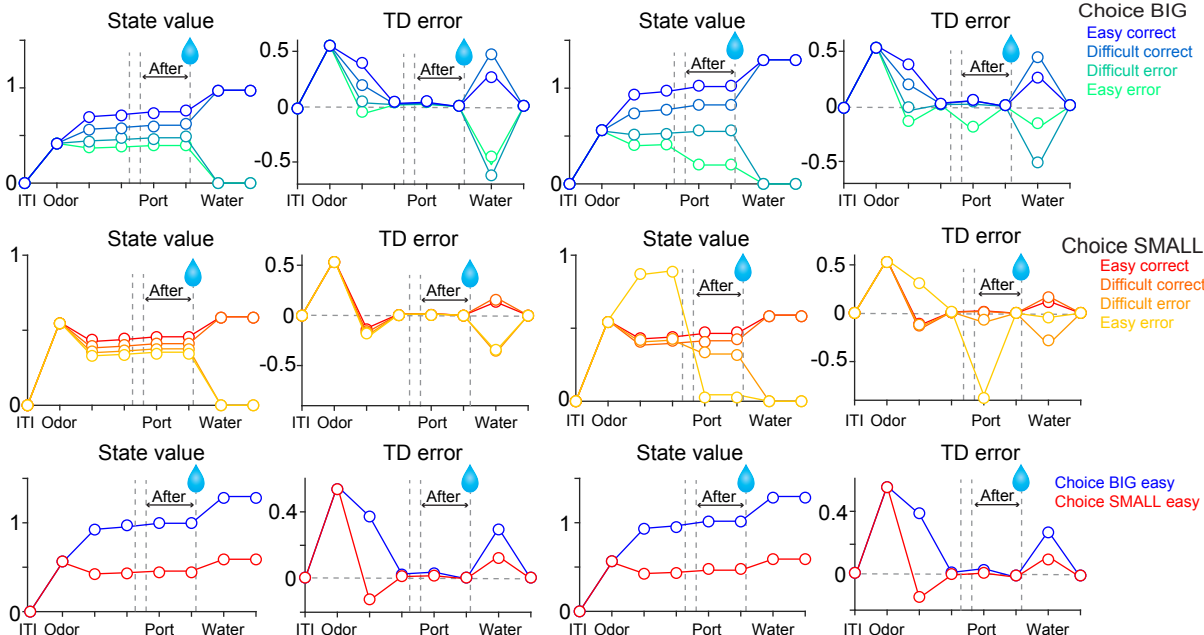

**G**

Softmax strategy

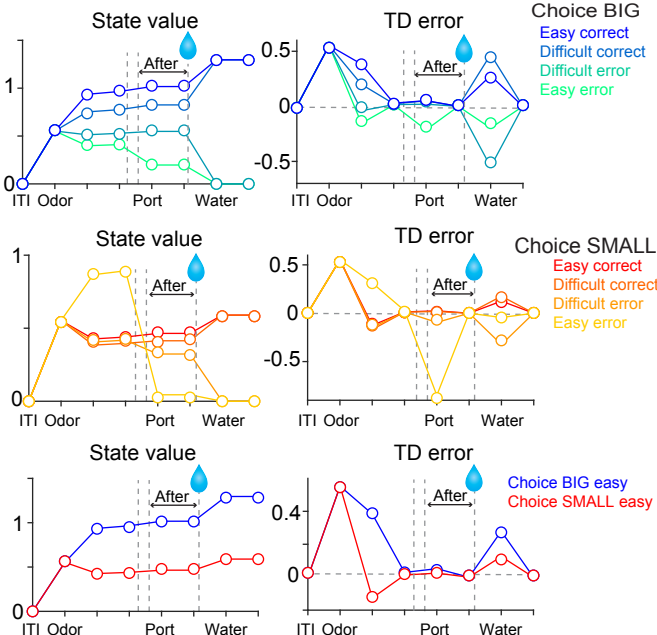

**H**

Actual data (Reaction time)

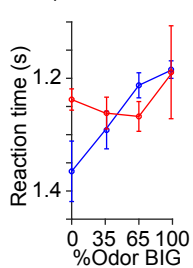

**I**

Actual data (Dopamine)

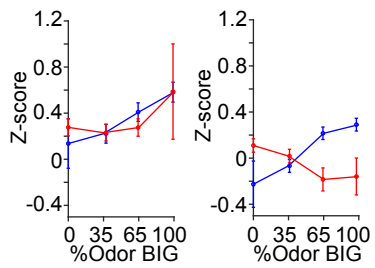

**J**

Model (deterministic choice)

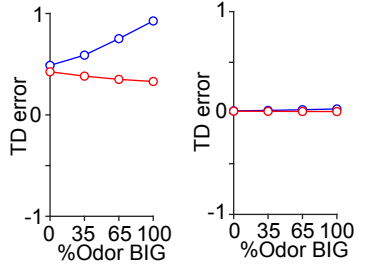

**K**

Model (Softmax strategy)

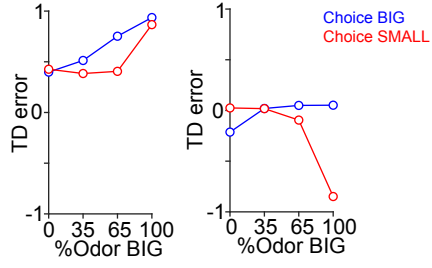

**Figure 7. TD error dynamics capture emergence of sensory evidence after stimulus-associated value in dopamine axon activity** (A) Trial structure in the model. Some repeated states are omitted for clarification. (B-D) Models were constructed by adding perceptual noise with normal distribution to each experimenter's odor (B left, subjective odor), calculating correct choice for each subjective odor (B right), and determining choice for each subjective odor (C or D left) according to choice strategy in the model. The final choice for each objective odor by experimenters (odor %) was calculated as the weighted sum of choice for subjective odors (C or D right). (E) Dopamine axon activity in trials with different levels of stimulus evidence: easy (pure odor, correct choice), difficult (mixture odor, correct choice), and error (mixture odor, error), when animals chose the BIG side (top) and when animals chose the SMALL side (middle). Bottom, dopamine axon activity when animals chose the BIG or SMALL side in easy trials (pure odor, correct choice). (F, G) Time-course in each trial of value (left) and TD error (right) of a model. (H) Line plots of actual reaction time from Figure 1G. Y-axis are flipped for better comparison with models. (I) Line plots of actual dopamine axon responses before and after choice from Figures 6B and 6C. (J, K) Model responses before and after choice were plotted with sensory evidence (odor %).

## Figure S1

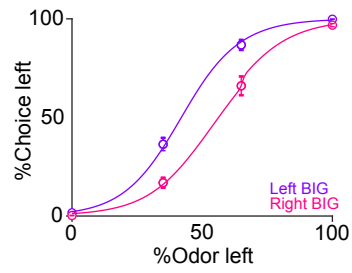

### Figure S1. Average psychometric curve in odor manipulation blocks

% of choice of a left port when a left port is the BIG side or when a right port is the BIG side (mean  $\pm$  SEM) and the average psychometric curve for each case.

## Figure S2

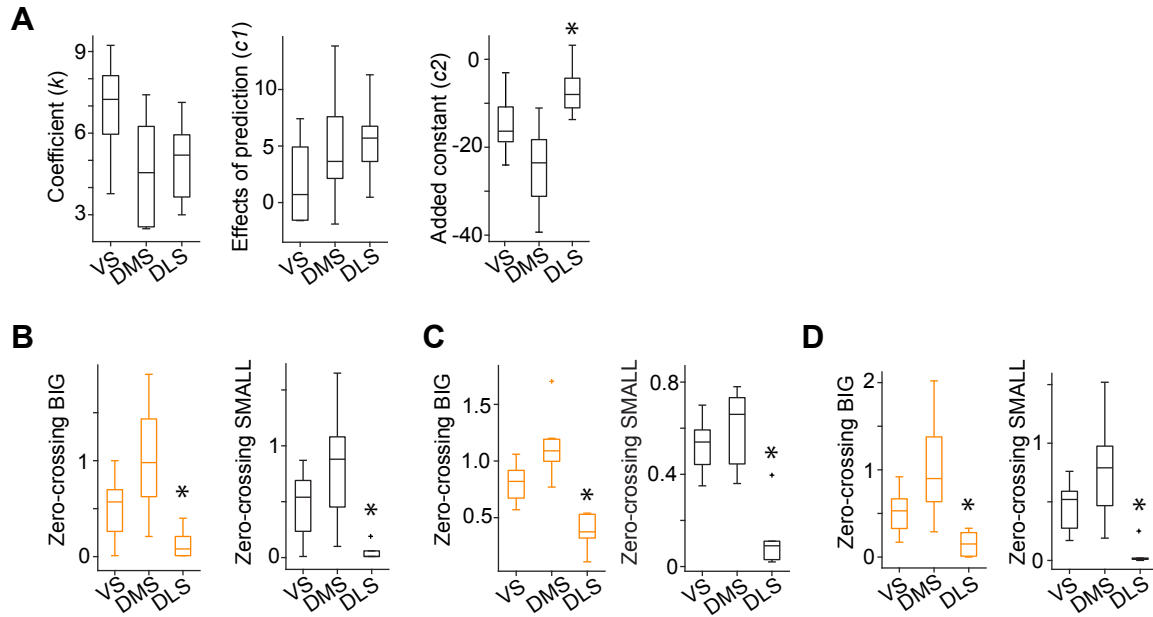

**Figure S2. Zero-crossing points across the striatum with different methods** (A) Each regression coefficient in the response function shown in Figure 4C. Fitting was performed by response =  $k(R^\alpha + c1 \times S + c2)$ , where R is the water amount, S is SMALL side (see Methods). (B) Zero-crossing points with linear function ( $p=0.003$  for BIG;  $p=6.1 \times 10^{-4}$  for SMALL, ANOVA). (C) Zero-crossing points with power function using a before-water time window (-1 to -0.2 s before water) as baseline. ( $p=5.8 \times 10^{-5}$  for BIG;  $p=2.1 \times 10^{-4}$  for SMALL, ANOVA). (D) Zero-crossing points using kernel models with power function ( $p=0.0033$  and  $p=8.9 \times 10^{-4}$ , ANOVA).

### Figure S3

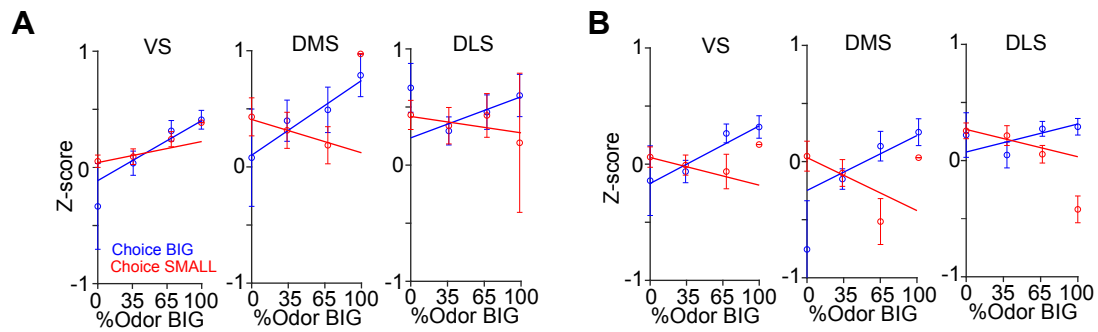

**Figure S3. Dopamine axon responses before and after choice in each striatal area** (A) Responses before choice (-1-0 s before odor port out) was fitted with linear regression with sensory evidence (odor %) and average fitted lines in each striatal area were plotted. The correlation slope for small choice was slightly modulated by striatal areas ( $p=0.0043$ , ANOVA;  $p=0.0013$ , VS versus DMS). (B) Responses after choice (0-1 s after water port in) was fitted with linear regression with sensory evidence and an average fitted line of each striatal area was plotted. The correlation slope was not significantly modulated by striatal areas ( $p=0.35$  for choice BIG;  $p=0.35$  for choice SMALL, ANOVA).

Figure S4

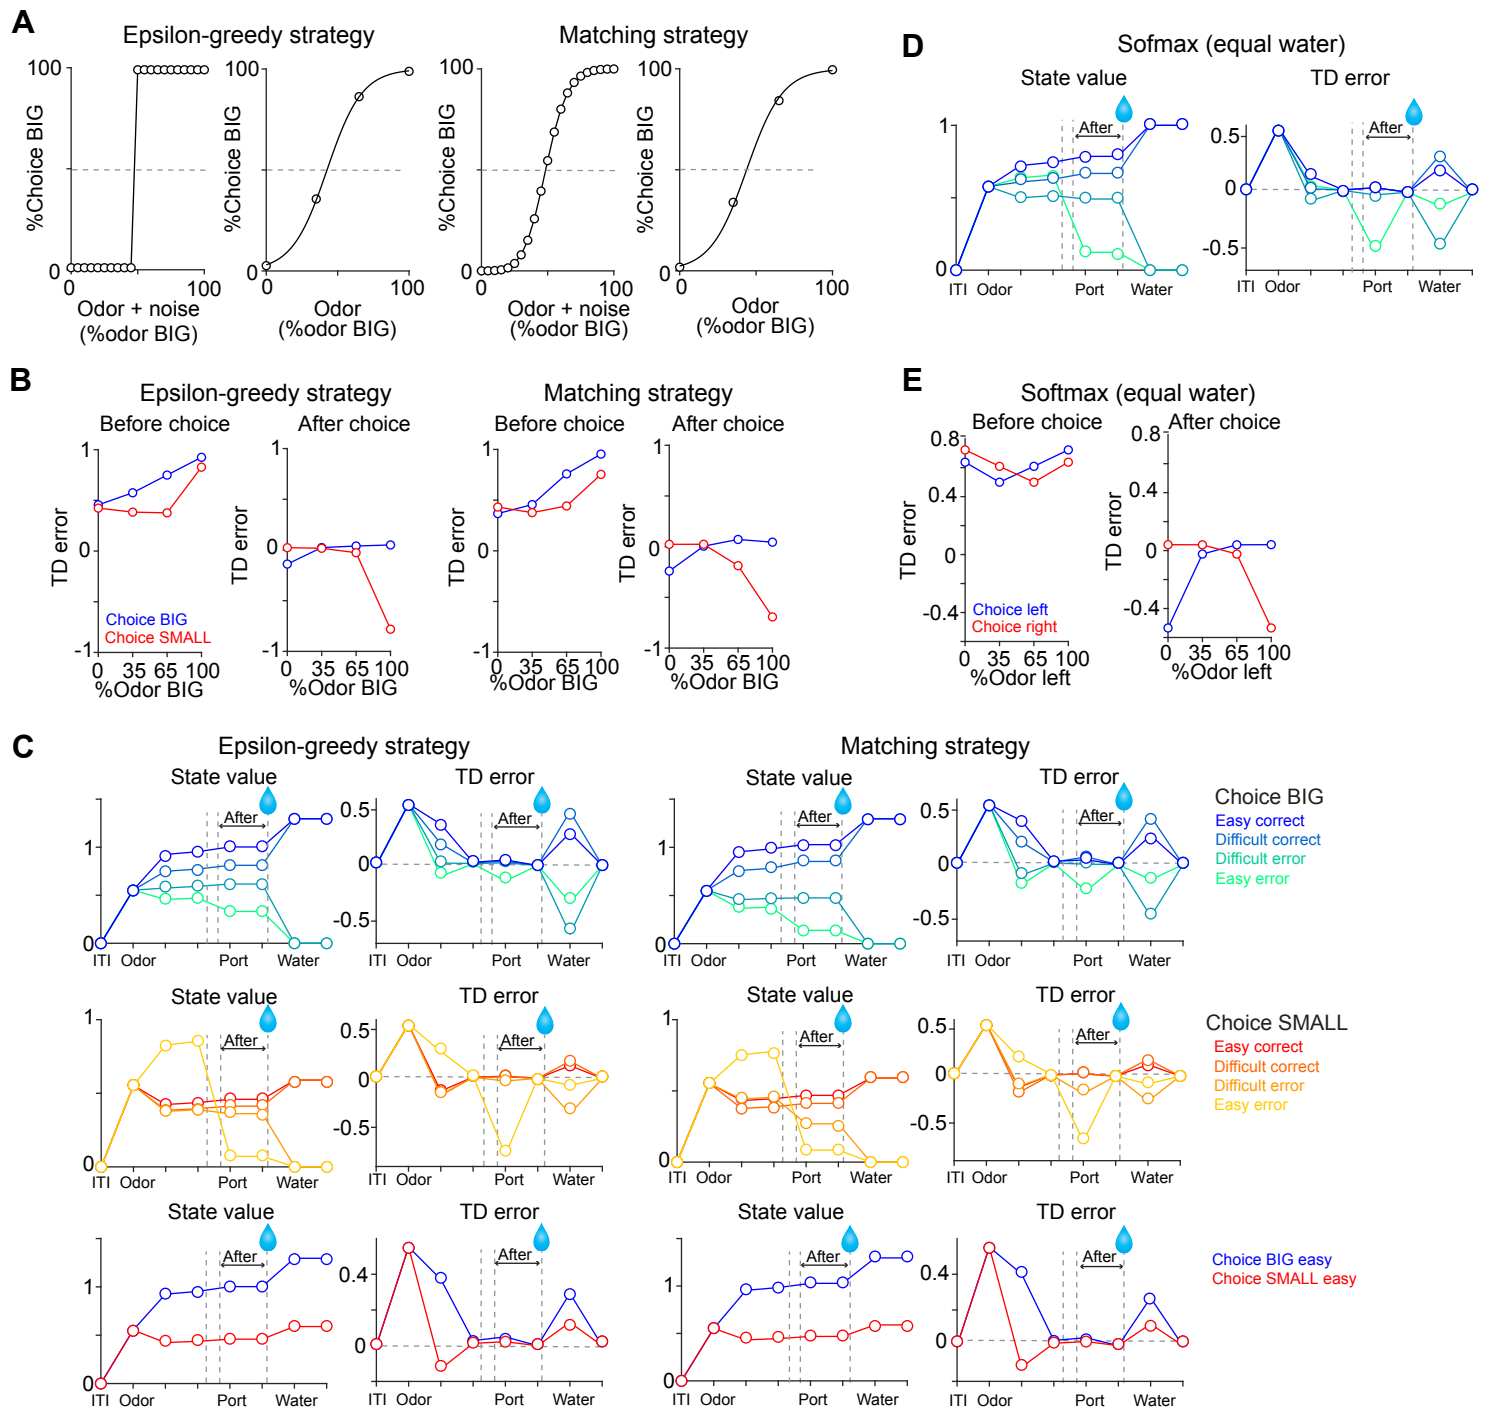

**Figure S4. TD errors with stochastic choice strategies.** (A) choice for each subjective odor (left) and choice for each objective odor (right) with epsilon greedy strategy and matching strategy. (B) TD errors with different sensory evidence (odor %) before and after choice in each model. (C) The temporal dynamics of state values and TD errors in each model. (D) The temporal dynamics of state values and TD errors with a softmax choice strategy (Figure 7D) but with equal amounts of water for both water ports. (E) TD errors with different levels of sensory evidence (odor %) before and after choice in model from D.
